# Supplementary material for: Evolutionary comparison of competitive protein-complex formation of MYB, bHLH, and WDR proteins in plants
Source: PubMed Central journal article supplement — J Exp Bot. 2019 Apr 9;70(12):3197–209. doi: 10.1093/jxb/erz155 (PMC6598095; doi:10.1093/jxb/erz155), 2019-04-09
Supplement: erz155_suppl_supplementary_tables_s1-s11.pdf [file erz155_suppl_supplementary_tables_s1-s11.pdf]

**Table S1. Pairwise interaction of MBW components in Arabidopsis (*A. thaliana*)**

| ProtA fusion | Luciferase fusion | Pull-down/input ratio (%) |   | References                                                                                                                            |
|--------------|-------------------|---------------------------|---|---------------------------------------------------------------------------------------------------------------------------------------|
| AtTTG1       | AtTTG1            | 0.35±0.00                 | - | (Baudry, et al. 2004)                                                                                                                 |
| AtTTG1       | AtGL3             | 27.43±0.02                | + | (Payne, et al. 2000; Zhang, et al. 2003; Zhao, et al. 2008)                                                                           |
| AtTTG1       | AtEGL3            | 10.58±0.12                | + | (Zhang, et al. 2003)                                                                                                                  |
| AtTTG1       | AtTT8             | 4.79±0.03                 | + | (Baudry, et al. 2004; Baudry, et al. 2006)                                                                                            |
| AtTTG1       | AtMYC1            | 59.70±1.09                | + | (Symonds, et al. 2011; Pesch, et al. 2013)                                                                                            |
| AtTTG1       | AtGL1             | 0.67±0.00                 | - | (Symonds, et al. 2011)                                                                                                                |
| AtTTG1       | AtWER             | 0.60±0.00                 | - | This work                                                                                                                             |
| AtTTG1       | AtPAP1            | 0.31±0.00                 | - | This work                                                                                                                             |
| AtTTG1       | AtPAP2            | 0.63±0.00                 | - | This work                                                                                                                             |
| AtTTG1       | AtTT2             | 1.95±0.05                 | w | (Baudry, et al. 2004; Baudry, et al. 2006)                                                                                            |
| AtTTG1       | AtMYB61           | 0.61±0.00                 | - | This work                                                                                                                             |
| AtTTG1       | w/o               | 0.55±0.01                 | - | This work                                                                                                                             |
| AtGL3        | AtTTG1            | 8.45±0.05                 | + | (Payne, et al. 2000; Zhang, et al. 2003; Zhao, et al. 2008)                                                                           |
| AtGL3        | AtGL3             | 5.44±0.04                 | + | (Payne, et al. 2000; Bernhardt, et al. 2003; Zhang, et al. 2003)                                                                      |
| AtGL3        | AtEGL3            | 2.70±0.01                 | + | (Zhang, et al. 2003)                                                                                                                  |
| AtGL3        | AtTT8             | 2.71±0.00                 | + | This work                                                                                                                             |
| AtGL3        | AtMYC1            | 2.59±0.03                 | + | (Zhao, et al. 2012) <sup>1</sup>                                                                                                      |
| AtGL3        | AtGL1             | 47.21±2.18                | + | (Payne, et al. 2000; Zhang, et al. 2003; Morohashi, et al. 2007; Zhao, et al. 2008; Morohashi and Grotewold 2009; Pesch, et al. 2013) |
| AtGL3        | AtWER             | 78.89±3.23                | + | (Bernhardt, et al. 2003; Zimmermann, et al. 2004; Tominaga, et al. 2007)                                                              |
| AtGL3        | AtPAP1            | 29.99±1.17                | + | (Zhang, et al. 2003; Baudry, et al. 2006)                                                                                             |
| AtGL3        | AtPAP2            | 22.59±2.14                | + | (Zhang, et al. 2003)                                                                                                                  |
| AtGL3        | AtTT2             | 33.40±3.09                | + | (Baudry, et al. 2006)                                                                                                                 |
| AtGL3        | AtMYB61           | 2.17±0.35                 | w | This work                                                                                                                             |
| AtGL3        | w/o               | 0.48±0.04                 | - | This work                                                                                                                             |
| AtEGL3       | AtTTG1            | 8.40±0.15                 | + | (Zhang, et al. 2003)                                                                                                                  |
| AtEGL3       | AtGL3             | 3.21±0.06                 | + | (Zhang, et al. 2003)                                                                                                                  |
| AtEGL3       | AtEGL3            | 2.89±0.02                 | + | (Bernhardt, et al. 2003; Zhang, et al. 2003)                                                                                          |
| AtEGL3       | AtTT8             | 4.09±0.01                 | + | This work                                                                                                                             |
| AtEGL3       | AtMYC1            | 2.25±0.02                 | w | This work                                                                                                                             |
| AtEGL3       | AtGL1             | 10.44±0.10                | + | (Zhang, et al. 2003; Zimmermann, et al. 2004; Morohashi, et al. 2007)                                                                 |
| AtEGL3       | AtWER             | 7.19±0.13                 | + | (Zimmermann, et al. 2004; Tominaga, et al. 2007)                                                                                      |

|        |         |            |   |                                                                                                                                       |
|--------|---------|------------|---|---------------------------------------------------------------------------------------------------------------------------------------|
| AtEGL3 | AtPAP1  | 7.85±0.06  | + | (Zimmermann, et al. 2004; Baudry, et al. 2006)                                                                                        |
| AtEGL3 | AtPAP2  | 6.25±0.04  | + | (Zhang, et al. 2003; Zimmermann, et al. 2004)                                                                                         |
| AtEGL3 | AtTT2   | 7.38±0.02  | + | (Zimmermann, et al. 2004; Baudry, et al. 2006)                                                                                        |
| AtEGL3 | AtMYB61 | 2.33±0.05  | w | This work                                                                                                                             |
| AtEGL3 | w/o     | 0.45±0.00  | - | This work                                                                                                                             |
| AtTT8  | AtTTG1  | 4.32±0.13  | + | (Baudry, et al. 2004)                                                                                                                 |
| AtTT8  | AtGL3   | 3.13±0.16  | + | This work                                                                                                                             |
| AtTT8  | AtEGL3  | 2.66±0.08  | + | This work                                                                                                                             |
| AtTT8  | AtTT8   | 2.94±0.04  | + | (Baudry, et al. 2004) <sup>2</sup>                                                                                                    |
| AtTT8  | AtMYC1  | 2.23±0.01  | w | This work                                                                                                                             |
| AtTT8  | AtGL1   | 3.72±0.05  | + | (Zimmermann, et al. 2004)                                                                                                             |
| AtTT8  | AtWER   | 2.28±0.01  | w | (Zimmermann, et al. 2004)                                                                                                             |
| AtTT8  | AtPAP1  | 15.91±0.12 | + | (Zimmermann, et al. 2004)                                                                                                             |
| AtTT8  | AtPAP2  | 15.69±0.11 | + | (Zimmermann, et al. 2004)                                                                                                             |
| AtTT8  | AtTT2   | 18.99±0.12 | + | (Baudry, et al. 2004; Zimmermann, et al. 2004; Baudry, et al. 2006)                                                                   |
| AtTT8  | AtMYB61 | 2.13±0.03  | w | This work                                                                                                                             |
| AtTT8  | w/o     | 0.55±0.00  | - | This work                                                                                                                             |
| AtMYC1 | AtTTG1  | 31.75±1.89 | + | (Symonds, et al. 2011; Pesch, et al. 2013)                                                                                            |
| AtMYC1 | AtGL3   | 2.39±0.30  | + | (Zhao, et al. 2012) <sup>1</sup>                                                                                                      |
| AtMYC1 | AtEGL3  | 2.30±0.04  | w | This work                                                                                                                             |
| AtMYC1 | AtTT8   | 2.39±0.03  | w | This work                                                                                                                             |
| AtMYC1 | AtMYC1  | 3.06±0.04  | + | (Zhao, et al. 2012) <sup>3</sup>                                                                                                      |
| AtMYC1 | AtGL1   | 21.17±0.12 | + | (Zimmermann, et al. 2004; Zhao, et al. 2012; Pesch, et al. 2013)                                                                      |
| AtMYC1 | AtWER   | 11.54±0.19 | + | (Zimmermann, et al. 2004; Zhao, et al. 2012)                                                                                          |
| AtMYC1 | AtPAP1  | 17.20±0.60 | + | (Zimmermann, et al. 2004)                                                                                                             |
| AtMYC1 | AtPAP2  | 15.34±0.31 | + | (Zimmermann, et al. 2004)                                                                                                             |
| AtMYC1 | AtTT2   | 18.26±1.37 | + | (Zimmermann, et al. 2004)                                                                                                             |
| AtMYC1 | AtMYB61 | 2.36±0.23  | w | This work                                                                                                                             |
| AtMYC1 | w/o     | 0.57±0.00  | - | This work                                                                                                                             |
| AtGL1  | AtTTG1  | 0.58±0.00  | - | (Symonds, et al. 2011)                                                                                                                |
| AtGL1  | AtGL3   | 19.61±0.59 | + | (Payne, et al. 2000; Zhang, et al. 2003; Morohashi, et al. 2007; Zhao, et al. 2008; Morohashi and Grotewold 2009; Pesch, et al. 2013) |
| AtGL1  | AtEGL3  | 17.76±0.75 | + | (Zhang, et al. 2003; Zimmermann, et al. 2004)                                                                                         |

|        |         |            |   |                                                                          |
|--------|---------|------------|---|--------------------------------------------------------------------------|
| AtGL1  | AtTT8   | 26.51±1.66 | + | (Zimmermann, et al. 2004)                                                |
| AtGL1  | AtMYC1  | 22.61±0.30 | + | (Zimmermann, et al. 2004; Zhao, et al. 2012; Pesch, et al. 2013)         |
| AtGL1  | AtGL1   | 1.81±0.05  | w | (Liang, et al. 2014)                                                     |
| AtGL1  | AtWER   | 0.61±0.01  | - | This work                                                                |
| AtGL1  | AtPAP1  | 0.63±0.00  | - | This work                                                                |
| AtGL1  | AtPAP2  | 0.59±0.03  | - | This work                                                                |
| AtGL1  | AtTT2   | 0.58±0.01  | - | This work                                                                |
| AtGL1  | AtMYB61 | 0.54±0.02  | - | This work                                                                |
| AtGL1  | w/o     | 0.57±0.02  | - | This work                                                                |
| AtWER  | AtTTG1  | 0.60±0.00  | - | This work                                                                |
| AtWER  | AtGL3   | 16.56±0.32 | + | (Bernhardt, et al. 2003; Zimmermann, et al. 2004; Tominaga, et al. 2007) |
| AtWER  | AtEGL3  | 19.88±0.74 | + | (Zimmermann, et al. 2004; Tominaga, et al. 2007)                         |
| AtWER  | AtTT8   | 2.44±0.98  | w | (Zimmermann, et al. 2004)                                                |
| AtWER  | AtMYC1  | 14.42±0.29 | + | (Zimmermann, et al. 2004; Zhao, et al. 2012)                             |
| AtWER  | AtGL1   | 0.62±0.03  | - | This work                                                                |
| AtWER  | AtWER   | 0.61±0.04  | - | This work                                                                |
| AtWER  | AtPAP1  | 0.63±0.03  | - | This work                                                                |
| AtWER  | AtPAP2  | 0.60±0.02  | - | This work                                                                |
| AtWER  | AtTT2   | 0.58±0.00  | - | This work                                                                |
| AtWER  | AtMYB61 | 0.57±0.01  | - | This work                                                                |
| AtWER  | w/o     | 0.58±0.00  | - | This work                                                                |
| AtPAP1 | AtTTG1  | 0.61±0.01  | - | This work                                                                |
| AtPAP1 | AtGL3   | 19.93±0.23 | + | (Zhang, et al. 2003; Baudry, et al. 2006)                                |
| AtPAP1 | AtEGL3  | 22.60±0.79 | + | (Zimmermann, et al. 2004; Baudry, et al. 2006)                           |
| AtPAP1 | AtTT8   | 25.83±0.85 | + | (Zimmermann, et al. 2004)                                                |
| AtPAP1 | AtMYC1  | 17.15±0.59 | + | (Zimmermann, et al. 2004)                                                |
| AtPAP1 | AtGL1   | 0.65±0.01  | - | This work                                                                |
| AtPAP1 | AtWER   | 0.61±0.01  | - | This work                                                                |
| AtPAP1 | AtPAP1  | 0.63±0.02  | - | This work                                                                |
| AtPAP1 | AtPAP2  | 0.60±0.04  | - | This work                                                                |
| AtPAP1 | AtTT2   | 0.58±0.02  | - | (Baudry, et al. 2006)                                                    |
| AtPAP1 | AtMYB61 | 0.62±0.03  | - | This work                                                                |
| AtPAP1 | w/o     | 0.57±0.02  | - | This work                                                                |

|         |         |            |   |                                                                     |
|---------|---------|------------|---|---------------------------------------------------------------------|
| AtPAP2  | AtTTG1  | 0.94±0.08  | - | This work                                                           |
| AtPAP2  | AtGL3   | 19.56±0.41 | + | (Zhang, et al. 2003)                                                |
| AtPAP2  | AtEGL3  | 12.44±0.17 | + | (Zhang, et al. 2003; Zimmermann, et al. 2004)                       |
| AtPAP2  | AtTT8   | 35.22±0.39 | + | (Zimmermann, et al. 2004)                                           |
| AtPAP2  | AtMYC1  | 17.15±0.99 | + | (Zimmermann, et al. 2004)                                           |
| AtPAP2  | AtGL1   | 0.65±0.01  | - | This work                                                           |
| AtPAP2  | AtWER   | 0.60±0.01  | - | This work                                                           |
| AtPAP2  | AtPAP1  | 0.65±0.02  | - | This work                                                           |
| AtPAP2  | AtPAP2  | 0.60±0.04  | - | This work                                                           |
| AtPAP2  | AtTT2   | 0.66±0.02  | - | This work                                                           |
| AtPAP2  | AtMYB61 | 0.62±0.03  | - | This work                                                           |
| AtPAP2  | w/o     | 0.55±0.02  | - | This work                                                           |
| AtTT2   | AtTTG1  | 0.82±0.02  | - | (Baudry, et al. 2004)                                               |
| AtTT2   | AtGL3   | 20.33±0.59 | + | (Baudry, et al. 2006)                                               |
| AtTT2   | AtEGL3  | 22.59±0.35 | + | (Zimmermann, et al. 2004; Baudry, et al. 2006)                      |
| AtTT2   | AtTT8   | 28.63±0.74 | + | (Baudry, et al. 2004; Zimmermann, et al. 2004; Baudry, et al. 2006) |
| AtTT2   | AtMYC1  | 19.59±0.99 | + | (Zimmermann, et al. 2004)                                           |
| AtTT2   | AtGL1   | 0.65±0.00  | - | This work                                                           |
| AtTT2   | AtWER   | 0.61±0.03  | - | This work                                                           |
| AtTT2   | AtPAP1  | 0.63±0.00  | - | (Baudry, et al. 2006)                                               |
| AtTT2   | AtPAP2  | 0.60±0.00  | - | This work                                                           |
| AtTT2   | AtTT2   | 1.87±0.02  | w | (Baudry, et al. 2004)                                               |
| AtTT2   | AtMYB61 | 0.62±0.01  | - | This work                                                           |
| AtTT2   | w/o     | 0.57±0.00  | - | This work                                                           |
| AtMYB61 | AtTTG1  | 0.60±0.01  | - | This work                                                           |
| AtMYB61 | AtGL3   | 0.85±0.04  | - | This work                                                           |
| AtMYB61 | AtEGL3  | 0.89±0.02  | - | This work                                                           |
| AtMYB61 | AtTT8   | 1.19±0.06  | - | This work                                                           |
| AtMYB61 | AtMYC1  | 0.88±0.01  | - | This work                                                           |
| AtMYB61 | AtGL1   | 0.64±0.04  | - | This work                                                           |
| AtMYB61 | AtWER   | 0.60±0.02  | - | This work                                                           |
| AtMYB61 | AtPAP1  | 0.63±0.02  | - | This work                                                           |
| AtMYB61 | AtPAP2  | 0.60±0.00  | - | This work                                                           |
| AtMYB61 | AtTT2   | 0.58±0.02  | - | This work                                                           |

|         |         |           |   |           |
|---------|---------|-----------|---|-----------|
| AtMYB61 | AtMYB61 | 0.62±0.02 | - | This work |
| AtMYB61 | w/o     | 0.57±0.00 | - | This work |
| w/o     | AtTTG1  | 0.54±0.01 | - | This work |
| w/o     | AtGL3   | 0.69±0.07 | - | This work |
| w/o     | AtEGL3  | 0.71±0.05 | - | This work |
| w/o     | AtTT8   | 0.70±0.09 | - | This work |
| w/o     | AtMYC1  | 0.68±0.01 | - | This work |
| w/o     | AtGL1   | 0.69±0.01 | - | This work |
| w/o     | AtWER   | 0.58±0.08 | - | This work |
| w/o     | AtPAP1  | 0.60±0.02 | - | This work |
| w/o     | AtPAP2  | 0.62±0.04 | - | This work |
| w/o     | AtTT2   | 0.57±0.03 | - | This work |
| w/o     | AtMYB61 | 0.65±0.01 | - | This work |
| w/o     | w/o     | 0.54±0.00 | - | This work |

The proteins were single-expressed in human cells (HEK293TN) and immunoprecipitated with IgG Dynabeads. Data are mean ± s.d. (n = 3).

w/o: Empty vector without CDS fusion.

+: Positive interaction (Luciferase activity  $\geq 2.5\%$ )

w: Weak interaction (Luciferase activity = 1.5% ~ 2.5%)

-: No interaction (Luciferase activity < 1.5%)

<sup>1</sup> In the reference (Zhao, et al. 2012), no interaction was found between AtMYC1 and AtGL3CT in yeast two hybrid.

<sup>2</sup> In the reference (Baudry, et al. 2004), AtTT8 homodimerization was not clearly supported in yeast two hybrid.

<sup>3</sup> In the reference (Zhao, et al. 2012), AtMYC1 homodimerization was not clearly supported in yeast two hybrid.

**Table S2:** Protein sequence identity matrix WD40 proteins

| <b>Pairwise</b> | <b>Identities</b> | <b>Similarities</b> |
|-----------------|-------------------|---------------------|
| AtTTG1 - GhTTG1 | 78.0              | 90.7                |
| AtTTG1 - GhTTG2 | 61.4              | 80.8                |
| AtTTG1 - GhTTG3 | 78.1              | 90.5                |
| AtTTG1 - GhTTG4 | 60.6              | 79.4                |
| AtTTG1 - PhAN11 | 78.1              | 92.4                |
| AtTTG1 - ZmPAC1 | 60.9              | 81.2                |
| AtTTG1 - ZmMP1  | 47.8              | 65.5                |

**Table S3:** Protein sequence identity matrix bHLH proteins

|                  |      |      |
|------------------|------|------|
| AtGL3 - AtEGL3   | 74.5 | 79.3 |
| AtGL3 - AtMYC1   | 37.8 | 48.0 |
| AtGL3 - AtTT8    | 32.9 | 43.5 |
| AtGL3 - AaGL3    | 88.7 | 90.7 |
| AtGL3 - AaEGL3   | 72.1 | 77.7 |
| AtGL3 - AaTT8    | 32.7 | 44.0 |
| AtGL3 - AaMYC1   | 36.1 | 46.4 |
| AtGL3 - GhDEL61  | 49.2 | 60.1 |
| AtGL3 - GhDEL65  | 52.3 | 60.4 |
| AtGL3 - PhAN1    | 34.7 | 44.9 |
| AtGL3 - PhJAF13  | 45.5 | 56.5 |
| AtGL3 - ZmR(Lc)  | 34.8 | 43.8 |
| AtGL3 - ZmR(S)   | 35.5 | 44.7 |
| AtGL3 - ZmB      | 33.4 | 42.2 |
| AtEGL3 - AtMYC1  | 34.4 | 44.3 |
| AtEGL3 - AtTT8   | 33.8 | 44.7 |
| AtEGL3 - AaGL3   | 74.2 | 78.4 |
| AtEGL3 - AaEGL3  | 84.6 | 88.5 |
| AtEGL3 - AaTT8   | 34.3 | 45.6 |
| AtEGL3 - AaMYC1  | 37.1 | 47.5 |
| AtEGL3 - GhDEL61 | 50.1 | 60.1 |
| AtEGL3 - GhDEL65 | 53.4 | 62.3 |
| AtEGL3 - PhAN1   | 35.1 | 43.9 |
| AtEGL3 - PhJAF13 | 45.1 | 55.4 |
| AtEGL3 - ZmR(Lc) | 35.2 | 44.5 |
| AtEGL3 - ZmR(S)  | 35.1 | 44.4 |
| AtEGL3 - ZmB     | 34.2 | 43.0 |
| AtTT8 - AtMYC1   | 30.9 | 40.2 |
| AtTT8 - AaGL3    | 32.4 | 43.0 |
| AtTT8 - AaEGL3   | 33.8 | 43.0 |
| AtTT8 - AaTT8    | 80.3 | 85.8 |
| AtTT8 - AaMYC1   | 34.2 | 42.5 |
| AtTT8 - GhDEL61  | 33.8 | 43.4 |
| AtTT8 - GhDEL65  | 33.8 | 44.2 |
| AtTT8 - PhAN1    | 43.9 | 52.4 |
| AtTT8 - PhJAF13  | 31.7 | 43.7 |
| AtTT8 - ZmR(Lc)  | 36.4 | 48.5 |
| AtTT8 - ZmR(S)   | 36.5 | 48.6 |
| AtTT8 - ZmB      | 36.0 | 47.8 |
| AtMYC1 - AaGL3   | 33.5 | 43.6 |
| AtMYC1 - AaEGL3  | 34.0 | 42.7 |
| AtMYC1 - AaTT8   | 31.8 | 40.3 |
| AtMYC1 - AaMYC1  | 74.4 | 77.1 |
| AtMYC1 - GhDEL61 | 34.6 | 42.5 |
| AtMYC1 - GhDEL65 | 33.6 | 42.6 |
| AtMYC1 - PhAN1   | 27.2 | 35.4 |
| AtMYC1 - PhJAF13 | 31.1 | 40.7 |
| AtMYC1 - ZmR(Lc) | 30.0 | 38.9 |
| AtMYC1 - ZmR(S)  | 29.8 | 39.2 |
| AtMYC1 - ZmB     | 29.8 | 36.5 |

**Table S4:** Protein sequence identity matrix R2R3 MYB proteins

|                  |      |      |
|------------------|------|------|
| AtGL1 - AtWER    | 55,9 | 64,0 |
| AtGL1 - AtPAP1   | 37,2 | 45,1 |
| AtGL1 - AtPAP2   | 37,2 | 42,9 |
| AtGL1 - AtTT2    | 36,2 | 45,3 |
| AtGL1 - AtMYB61  | 27,1 | 36,6 |
| AtGL1 - AaGL1    | 79,7 | 84,1 |
| AtGL1 - AaWER    | 55,2 | 64,0 |
| AtGL1 - AaPAPL   | 36,3 | 36,3 |
| AtGL1 - GhMYB2   | 38,4 | 49,2 |
| AtGL1 - GhMYB25  | 32,2 | 39,0 |
| AtGL1 - GhRLC1   | 33,9 | 40,8 |
| AtGL1 - PhAN2    | 36,6 | 48,0 |
| AtGL1 - PhAN4    | 35,2 | 43,8 |
| AtGL1 - PhPH4    | 36,6 | 47,0 |
| AtGL1 - ZmC1     | 35,4 | 44,7 |
| AtGL1 - ZmPL     | 35,2 | 42,9 |
| AtGL1 - ZmP1     | 30,2 | 37,6 |
| AtWER - AtPAP1   | 35,4 | 42,4 |
| AtWER - AtPAP2   | 35,9 | 42,3 |
| AtWER - AtTT2    | 37,0 | 46,5 |
| AtWER - AtMYB61  | 27,1 | 34,5 |
| AtWER - AaGL1    | 58,4 | 66,5 |
| AtWER - AaWER    | 93,7 | 94,6 |
| AtWER - AaPAPL   | 36,2 | 42,5 |
| AtWER - GhMYB2   | 45,6 | 56,2 |
| AtWER - GhMYB25  | 33,1 | 39,6 |
| AtWER - GhRLC1   | 38,6 | 45,1 |
| AtWER - PhAN2    | 37,3 | 46,3 |
| AtWER - PhAN4    | 34,9 | 42,8 |
| AtWER - PhPH4    | 41,6 | 48,6 |
| AtWER - ZmC1     | 34,1 | 43,4 |
| AtWER - ZmPL     | 36,2 | 42,5 |
| AtWER - ZmP1     | 29,8 | 35,8 |
| AtPAP1 - AtPAP2  | 78,8 | 83,2 |
| AtPAP1 - AtTT2   | 36,4 | 44,0 |
| AtPAP1 - AtMYB61 | 31,5 | 36,4 |
| AtPAP1 - AaGL1   | 35,9 | 44,8 |
| AtPAP1 - AaWER   | 36,9 | 41,8 |
| AtPAP1 - AaPAPL  | 76,3 | 83,1 |
| AtPAP1 - GhMYB2  | 37,0 | 45,3 |
| AtPAP1 - GhMYB25 | 34,5 | 40,8 |
| AtPAP1 - GhRLC1  | 49,0 | 54,1 |
| AtPAP1 - PhAN2   | 46,7 | 55,4 |
| AtPAP1 - PhAN4   | 38,2 | 45,2 |
| AtPAP1 - PhPH4   | 38,2 | 45,2 |
| AtPAP1 - ZmC1    | 34,1 | 41,5 |
| AtPAP1 - ZmPL    | 33,6 | 41,0 |
| AtPAP1 - ZmP1    | 32,7 | 39,5 |
| AtPAP2 - AtTT2   | 36,3 | 43,9 |
| AtPAP2 - AtMYB61 | 30,9 | 37,1 |
| AtPAP2 - AaGL1   | 37,5 | 44,9 |
| AtPAP2 - AaWER   | 35,6 | 42,7 |
| AtPAP2 - AaPAPL  | 78,4 | 83,6 |
| AtPAP2 - GhMYB2  | 37,1 | 47,1 |
| AtPAP2 - GhMYB25 | 35,1 | 40,2 |
| AtPAP2 - GhRLC1  | 48,3 | 54,2 |
| AtPAP2 - PhAN2   | 47,3 | 54,1 |
| AtPAP2 - PhAN4   | 44,5 | 49,7 |
| AtPAP2 - PhPH4   | 36,7 | 45,7 |
| AtPAP2 - ZmC1    | 34,3 | 43,2 |
| AtPAP2 - ZmPL    | 35,4 | 44,0 |



|                   |      |      |
|-------------------|------|------|
| AtPAP2 - ZmP1     | 31,8 | 38,8 |
| AtTT2 - AtMYB61   | 32,2 | 39,0 |
| AtTT2 - AaGL1     | 36,4 | 45,5 |
| AtTT2 - AaWER     | 38,4 | 47,6 |
| AtTT2 - AaPAPL    | 38,8 | 45,2 |
| AtTT2 - GhMYB2    | 40,0 | 47,4 |
| AtTT2- GhMYB25    | 36,3 | 44,7 |
| AtTT2 - GhRCL1    | 37,8 | 45,8 |
| AtTT2 - PhAN2     | 39,9 | 49,7 |
| AtTT2- PhAN4      | 38,0 | 47,1 |
| AtTT2- PhPH4      | 36,8 | 45,7 |
| AtTT2 - ZmC1      | 39,6 | 46,0 |
| AtTT2 - ZmPL      | 39,5 | 46,9 |
| AtTT2 - ZmP1      | 35,8 | 41,5 |
| AtMYB61 - AaGL1   | 28,8 | 36,1 |
| AtMYB61 - AaWER   | 26,8 | 34,0 |
| AtMYB61 - AaPAPL  | 32,7 | 39,5 |
| AtMYB61 - GhMYB2  | 27,3 | 32,5 |
| AtMYB61 - GhMYB25 | 38,8 | 45,5 |
| AtMYB61 - GhRCL1  | 30,3 | 37,9 |
| AtMYB61 - PhAN2   | 31,9 | 39,1 |
| AtMYB61 - PhAN4   | 30,8 | 39,5 |
| AtMYB61 - PhPH4   | 34,9 | 41,6 |
| AtMYB61 - ZmC1    | 30,2 | 38,1 |
| AtMYB61 - ZmPL    | 33,1 | 39,2 |
| AtMYB61 - ZmP1    | 33,9 | 40,9 |

**Table S5. Pairwise interaction of MBW components in Arabis (*A. alpine*)**

| BD or ProtA fusion | AD or Luciferase fusion | Yeast two hybrid | Pulldown/input ratio (%) |   | References |
|--------------------|-------------------------|------------------|--------------------------|---|------------|
| AaTTG1             | AaTTG1                  | -                | 0.63±0.01                | - | This work  |
| AaTTG1             | AaGL3                   | +                | 4.06±0.39                | + | This work  |
| AaTTG1             | AaEGL3                  | +                | 4.54±0.27                | + | This work  |
| AaTTG1             | AaTT8                   | +                | 5.53±0.11                | + | This work  |
| AaTTG1             | AaMYC1                  | +                | 4.33±0.19                | + | This work  |
| AaTTG1             | AaGL1                   | -                | 0.61±0.02                | - | This work  |
| AaTTG1             | AaWER                   | -                | 0.62±0.02                | - | This work  |
| AaTTG1             | AaPAPL                  | -                | 0.65±0.01                | - | This work  |
| AaTTG1             | w/o                     | -                | 0.55±0.01                | - | This work  |
| AaGL3              | AaTTG1                  | +                | 7.74±0.29                | + | This work  |
| AaGL3              | AaGL3                   | +                | 3.87±0.04                | + | This work  |
| AaGL3              | AaEGL3                  | +                | 2.69±0.03                | + | This work  |
| AaGL3              | AaTT8                   | w                | 4.77±0.07                | + | This work  |
| AaGL3              | AaMYC1                  | w                | 3.76±0.09                | + | This work  |
| AaGL3              | AaGL1                   | +                | 15.74±1.63               | + | This work  |
| AaGL3              | AaWER                   | +                | 14.84±1.00               | + | This work  |
| AaGL3              | AaPAPL                  | +                | 10.38±0.35               | + | This work  |
| AaGL3              | w/o                     | -                | 0.58±0.01                | - | This work  |
| AaEGL3             | AaTTG1                  | +                | 8.12±0.54                | + | This work  |
| AaEGL3             | AaGL3                   | w                | 3.83±0.20                | + | This work  |
| AaEGL3             | AaEGL3                  | w                | 3.09±0.05                | + | This work  |
| AaEGL3             | AaTT8                   | w                | 5.01±0.17                | + | This work  |
| AaEGL3             | AaMYC1                  | -                | 2.23±0.04                | w | This work  |
| AaEGL3             | AaGL1                   | +                | 5.74±1.19                | + | This work  |
| AaEGL3             | AaWER                   | +                | 6.84±1.06                | + | This work  |
| AaEGL3             | AaPAPL                  | +                | 5.38±0.61                | + | This work  |
| AaEGL3             | w/o                     | -                | 0.57±0.01                | - | This work  |
| AaTT8              | AaTTG1                  | +                | 8.51±1.31                | + | This work  |
| AaTT8              | AaGL3                   | -                | 2.96±0.12                | + | This work  |
| AaTT8              | AaEGL3                  | -                | 1.91±0.02                | w | This work  |

---

|        |        |   |            |   |                        |
|--------|--------|---|------------|---|------------------------|
| AaTT8  | AaTT8  | w | 3.62±0.17  | + | This work              |
| AaTT8  | AaMYC1 | - | 2.83±0.04  | + | This work              |
| AaTT8  | AaGL1  | + | 4.74±0.36  | + | This work              |
| AaTT8  | AaWER  | + | 3.97±0.19  | + | This work              |
| AaTT8  | AaPAPL | + | 4.25±0.08  | + | This work              |
| AaTT8  | w/o    | - | 0.58±0.01  | - | This work              |
| AaMYC1 | AaTTG1 | + | 6.93±0.16  | + | This work              |
| AaMYC1 | AaGL3  | - | 3.31±0.07  | + | This work <sup>1</sup> |
| AaMYC1 | AaEGL3 | - | 1.97±0.04  | w | This work <sup>1</sup> |
| AaMYC1 | AaTT8  | - | 3.62±0.17  | + | This work <sup>1</sup> |
| AaMYC1 | AaMYC1 | - | 2.83±0.04  | + | This work <sup>1</sup> |
| AaMYC1 | AaGL1  | + | 4.74±0.36  | + | This work              |
| AaMYC1 | AaWER  | + | 3.97±0.19  | + | This work              |
| AaMYC1 | AaPAPL | + | 4.25±0.08  | + | This work              |
| AaMYC1 | w/o    | - | 0.58±0.01  | - | This work              |
| AaGL1  | AaTTG1 | - | 0.60±0.02  | - | This work              |
| AaGL1  | AaGL3  | + | 9.56±0.14  | + | This work              |
| AaGL1  | AaEGL3 | + | 8.22±0.47  | + | This work              |
| AaGL1  | AaTT8  | + | 8.80±0.17  | + | This work              |
| AaGL1  | AaMYC1 | + | 11.28±0.38 | + | This work              |
| AaGL1  | AaGL1  | - | 0.64±0.01  | - | This work              |
| AaGL1  | AaWER  | - | 0.62±0.02  | - | This work              |
| AaGL1  | AaPAPL | - | 0.62±0.00  | - | This work              |
| AaGL1  | w/o    | - | 0.57±0.00  | - | This work              |
| AaWER  | AaTTG1 | A | 0.62±0.02  | - | This work              |
| AaWER  | AaGL3  | A | 14.37±0.69 | + | This work              |
| AaWER  | AaEGL3 | A | 14.44±0.64 | + | This work              |
| AaWER  | AaTT8  | A | 15.52±1.38 | + | This work              |
| AaWER  | AaMYC1 | A | 13.59±1.00 | + | This work              |
| AaWER  | AaGL1  | A | 0.66±0.02  | - | This work              |
| AaWER  | AaWER  | A | 0.60±0.01  | - | This work              |
| AaWER  | AaPAPL | A | 0.61±0.00  | - | This work              |
| AaWER  | w/o    | A | 0.57±0.00  | - | This work              |

---

|        |        |   |            |   |           |
|--------|--------|---|------------|---|-----------|
| AaPAPL | AaTTG1 | A | 0.61±0.02  | - | This work |
| AaPAPL | AaGL3  | A | 13.90±0.52 | + | This work |
| AaPAPL | AaEGL3 | A | 8.59±0.29  | + | This work |
| AaPAPL | AaTT8  | A | 35.31±3.17 | + | This work |
| AaPAPL | AaMYC1 | A | 20.96±2.38 | + | This work |
| AaPAPL | AaGL1  | A | 0.61±0.01  | - | This work |
| AaPAPL | AaWER  | A | 0.63±0.02  | - | This work |
| AaPAPL | AaPAPL | A | 0.63±0.01  | - | This work |
| AaPAPL | w/o    | A | 0.59±0.01  | - | This work |
| w/o    | AaTTG1 | - | 0.61±0.03  | - | This work |
| w/o    | AaGL3  | - | 0.65±0.02  | - | This work |
| w/o    | AaEGL3 | - | 0.60±0.01  | - | This work |
| w/o    | AaTT8  | - | 0.58±0.02  | - | This work |
| w/o    | AaMYC1 | - | 0.59±0.03  | - | This work |
| w/o    | AaGL1  | - | 0.64±0.01  | - | This work |
| w/o    | AaWER  | - | 0.63±0.02  | - | This work |
| w/o    | AaPAPL | - | 0.66±0.01  | - | This work |
| w/o    | w/o    | - | 0.57±0.01  | - | This work |

The proteins were single-expressed in human cells (HEK293TN) and immunoprecipitated with IgG Dynabeads. Data are mean ± s.d. (n = 3).

w/o: Empty vector without CDS fusion.

+: Positive interaction (Luciferase activity ≥ 2.5%)

w: Weak interaction (Few colonies grew on SD-L/W/H with 3-AT or Luciferase activity = 1.5% ~ 2.5%)

-: No interaction (Luciferase activity < 1.5%)

**Table S6. Pairwise interaction of MBW components in Cotton (*G.hirsutum*)**

| <b>BD or ProtA fusion</b> | <b>AD or Luciferase fusion</b> | <b>Yeast two hybrid</b> | <b>Pulldown/input ratio (%)</b> |   | <b>References</b>        |
|---------------------------|--------------------------------|-------------------------|---------------------------------|---|--------------------------|
| GhTTG1                    | GhTTG1                         | -                       | 0.45±0.06                       | - | This work                |
| GhTTG1                    | GhTTG2                         | -                       | 0.47±0.05                       | - | This work                |
| GhTTG1                    | GhTTG3                         | -                       | 0.59±0.05                       | - | This work                |
| GhTTG1                    | GhTTG4                         | -                       | 0.57±0.05                       | - | This work                |
| GhTTG1                    | GhDEL61                        | +                       | 6.18±0.89                       | + | This work                |
| GhTTG1                    | GhDEL65                        | +                       | 13.86±2.80                      | + | This work                |
| GhTTG1                    | GhMYB2                         | -                       | 0.55±0.07                       | - | This work                |
| GhTTG1                    | GhMYB25                        | -                       | 0.61±0.04                       | - | This work                |
| GhTTG1                    | GhRLC1                         | -                       | 0.61±0.06                       | - | This work                |
| GhTTG1                    | w/o                            | -                       | 0.50±0.03                       | - | This work                |
| GhTTG2                    | GhTTG1                         | -                       | 0.52±0.08                       | - | This work                |
| GhTTG2                    | GhTTG2                         | -                       | 0.57±0.02                       | - | This work                |
| GhTTG2                    | GhTTG3                         | -                       | 0.59±0.04                       | - | This work                |
| GhTTG2                    | GhTTG4                         | -                       | 0.56±0.05                       | - | This work                |
| GhTTG2                    | GhDEL61                        | -                       | 0.58±0.05                       | - | This work                |
| GhTTG2                    | GhDEL65                        | -                       | 0.61±0.04                       | - | This work                |
| GhTTG2                    | GhMYB2                         | -                       | 0.59±0.04                       | - | This work                |
| GhTTG2                    | GhMYB25                        | -                       | 0.61±0.04                       | - | This work                |
| GhTTG2                    | GhRLC1                         | -                       | 0.59±0.07                       | - | This work                |
| GhTTG2                    | w/o                            | -                       | 0.49±0.03                       | - | This work                |
| GhTTG3                    | GhTTG1                         | -                       | 0.48±0.08                       | - | This work                |
| GhTTG3                    | GhTTG2                         | -                       | 0.57±0.04                       | - | This work                |
| GhTTG3                    | GhTTG3                         | -                       | 0.59±0.05                       | - | This work                |
| GhTTG3                    | GhTTG4                         | -                       | 0.56±0.05                       | - | This work                |
| GhTTG3                    | GhDEL61                        | +                       | 6.90±0.11                       | + | (Shangguan, et al. 2016) |
| GhTTG3                    | GhDEL65                        | +                       | 14.83±3.27                      | + | (Shangguan, et al. 2016) |
| GhTTG3                    | GhMYB2                         | -                       | 0.57±0.03                       | - | This work                |
| GhTTG3                    | GhMYB25                        | -                       | 0.63±0.06                       | - | This work                |
| GhTTG3                    | GhRLC1                         | -                       | 0.61±0.07                       | - | This work                |
| GhTTG3                    | w/o                            | -                       | 0.49±0.04                       | - | This work                |

|         |         |   |            |   |                                            |
|---------|---------|---|------------|---|--------------------------------------------|
| GhTTG4  | GhTTG1  | - | 0.53±0.09  | - | This work                                  |
| GhTTG4  | GhTTG2  | - | 0.51±0.05  | - | This work                                  |
| GhTTG4  | GhTTG3  | - | 0.58±0.05  | - | This work                                  |
| GhTTG4  | GhTTG4  | - | 0.56±0.05  | - | This work                                  |
| GhTTG4  | GhDEL61 | - | 0.58±0.03  | - | This work                                  |
| GhTTG4  | GhDEL65 | - | 0.65±0.05  | - | This work                                  |
| GhTTG4  | GhMYB2  | - | 0.57±0.06  | - | This work                                  |
| GhTTG4  | GhMYB25 | - | 0.64±0.05  | - | This work                                  |
| GhTTG4  | GhRLC1  | - | 0.60±0.07  | - | This work                                  |
| GhTTG4  | w/o     | - | 0.49±0.03  | - | This work                                  |
| GhDEL61 | GhTTG1  | A | 8.86±0.40  | + | This work                                  |
| GhDEL61 | GhTTG2  | A | 0.56±0.05  | - | This work                                  |
| GhDEL61 | GhTTG3  | A | 7.59±0.27  | + | (Shangguan, et al. 2016)                   |
| GhDEL61 | GhTTG4  | A | 0.57±0.06  | - | This work                                  |
| GhDEL61 | GhDEL61 | A | 3.60±0.11  | + | (Shangguan, et al. 2016)                   |
| GhDEL61 | GhDEL65 | A | 4.86±3.27  | + | (Shangguan, et al. 2016)                   |
| GhDEL61 | GhMYB2  | A | 39.53±8.13 | + | (Wan, et al. 2014; Shangguan, et al. 2016) |
| GhDEL61 | GhMYB25 | A | 5.84±0.12  | + | (Wan, et al. 2014)                         |
| GhDEL61 | GhRLC1  | A | 42.22±5.83 | + | This work                                  |
| GhDEL61 | w/o     | A | 0.49±0.04  | - | This work                                  |
| GhDEL65 | GhTTG1  | + | 20.93±5.04 | + | (Wang, et al. 2013)                        |
| GhDEL65 | GhTTG2  | - | 0.56±0.03  | - | This work                                  |
| GhDEL65 | GhTTG3  | + | 15.54±2.20 | + | (Shangguan, et al. 2016)                   |
| GhDEL65 | GhTTG4  | - | 0.56±0.03  | - | This work                                  |
| GhDEL65 | GhDEL61 | + | 3.74±0.11  | + | (Shangguan, et al. 2016)                   |
| GhDEL65 | GhDEL65 | + | 3.86±3.27  | + | (Shangguan, et al. 2016)                   |
| GhDEL65 | GhMYB2  | + | 43.67±6.25 | + | (Wan, et al. 2014; Shangguan, et al. 2016) |
| GhDEL65 | GhMYB25 | + | 4.83±0.38  | + | (Wan, et al. 2014)                         |
| GhDEL65 | GhRLC1  | + | 40.60±3.77 | + | This work                                  |
| GhDEL65 | w/o     | - | 0.50±0.03  | - | This work                                  |
| GhMYB2  | GhTTG1  | A | 0.63±0.04  | - | This work                                  |
| GhMYB2  | GhTTG2  | A | 0.58±0.04  | - | This work                                  |

|         |         |   |            |   |                                                  |
|---------|---------|---|------------|---|--------------------------------------------------|
| GhMYB2  | GhTTG3  | A | 0.61±0.03  | - | This work                                        |
| GhMYB2  | GhTTG4  | A | 0.57±0.05  | - | This work                                        |
| GhMYB2  | GhDEL61 | A | 13.72±0.41 | + | (Wan, et al. 2014;<br>Shangguan, et al.<br>2016) |
| GhMYB2  | GhDEL65 | A | 17.80±1.71 | + | (Wan, et al. 2014;<br>Shangguan, et al.<br>2016) |
| GhMYB2  | GhMYB2  | A | 0.66±0.06  | - | This work                                        |
| GhMYB2  | GhMYB25 | A | 0.59±0.06  | - | This work                                        |
| GhMYB2  | GhRLC1  | A | 0.63±0.07  | - | This work                                        |
| GhMYB2  | w/o     | A | 0.51±0.02  | - | This work                                        |
| GhMYB25 | GhTTG1  | A | 0.64±0.07  | - | This work                                        |
| GhMYB25 | GhTTG2  | A | 0.53±0.04  | - | This work                                        |
| GhMYB25 | GhTTG3  | A | 0.57±0.06  | - | This work                                        |
| GhMYB25 | GhTTG4  | A | 0.51±0.04  | - | This work                                        |
| GhMYB25 | GhDEL61 | A | 7.99±0.30  | + | (Wan, et al. 2014)                               |
| GhMYB25 | GhDEL65 | A | 9.48±0.85  | + | (Wan, et al. 2014)                               |
| GhMYB25 | GhMYB2  | A | 0.60±0.07  | - | This work                                        |
| GhMYB25 | GhMYB25 | A | 0.62±0.04  | - | This work                                        |
| GhMYB25 | GhRLC1  | A | 0.67±0.07  | - | This work                                        |
| GhMYB25 | w/o     | A | 0.52±0.04  | - | This work                                        |
| GhRLC1  | GhTTG1  | A | 0.65±0.06  | - | This work                                        |
| GhRLC1  | GhTTG2  | A | 0.55±0.04  | - | This work                                        |
| GhRLC1  | GhTTG3  | A | 0.60±0.06  | - | This work                                        |
| GhRLC1  | GhTTG4  | A | 0.53±0.04  | - | This work                                        |
| GhRLC1  | GhDEL61 | A | 9.64±0.26  | + | This work                                        |
| GhRLC1  | GhDEL65 | A | 9.38±1.17  | + | This work                                        |
| GhRLC1  | GhMYB2  | A | 0.60±0.05  | - | This work                                        |
| GhRLC1  | GhMYB25 | A | 0.66±0.03  | - | This work                                        |
| GhRLC1  | GhRLC1  | A | 0.68±0.06  | - | This work                                        |
| GhRLC1  | w/o     | A | 0.49±0.03  | - | This work                                        |
| w/o     | GhTTG1  | - | 0.67±0.06  | - | This work                                        |
| w/o     | GhTTG2  | - | 0.55±0.03  | - | This work                                        |
| w/o     | GhTTG3  | - | 0.62±0.05  | - | This work                                        |
| w/o     | GhTTG4  | - | 0.56±0.03  | - | This work                                        |

|     |         |   |           |   |           |
|-----|---------|---|-----------|---|-----------|
| w/o | GhDEL61 | - | 0.53±0.02 | - | This work |
| w/o | GhDEL65 | - | 0.61±0.03 | - | This work |
| w/o | GhMYB2  | - | 0.64±0.05 | - | This work |
| w/o | GhMYB25 | - | 0.64±0.03 | - | This work |
| w/o | GhRLC1  | - | 0.67±0.07 | - | This work |
| w/o | w/o     | - | 0.49±0.04 | - | This work |

The proteins were single-expressed in human cells (HEK293TN) and immunoprecipitated with IgG Dynabeads. Data are mean ± s.d. (n = 3).

w/o: Empty vector without CDS fusion.

+: Positive interaction (Luciferase activity ≥ 2.5%)

w: Weak interaction (Few colonies grew on SD-L/W/H with 3-AT or Luciferase activity = 1.5% ~ 2.5%)

-: No interaction (Luciferase activity < 1.5%)

A: Autoactivation



**Table S7. Pairwise interaction of MBW components in *Petunia (P. hybrida)***

| <b>BD or ProtA fusion</b> | <b>AD or Luciferase fusion</b> | <b>Yeast two hybrid</b> | <b>Pulldown/input ratio (%)</b> |   | <b>References</b>                                                                 |
|---------------------------|--------------------------------|-------------------------|---------------------------------|---|-----------------------------------------------------------------------------------|
| PhAN11                    | PhAN11                         | -                       | 0.58±0.08                       | - | (Albert, et al. 2014)                                                             |
| PhAN11                    | PhAN1                          | +                       | 18.45±0.65                      | + | (Albert, et al. 2014)                                                             |
| PhAN11                    | PhJAF13                        | +                       | 26.77±4.24                      | + | (Albert, et al. 2014)                                                             |
| PhAN11                    | PhAN2                          | +                       | 0.59±0.02                       | - | (Albert, et al. 2014) <sup>1</sup>                                                |
| PhAN11                    | PhAN4                          | +                       | 0.55±0.02                       | - | This work                                                                         |
| PhAN11                    | PhPH4                          | -                       | 0.56±0.07                       | - | This work                                                                         |
| PhAN11                    | w/o                            | -                       | 0.48±0.03                       | - | (Albert, et al. 2014)                                                             |
| PhAN1                     | PhAN11                         | +                       | 29.75±3.68                      | + | (Albert, et al. 2014)                                                             |
| PhAN1                     | PhAN1                          | w                       | 9.19±2.91                       | + | (Spelt, et al. 2002; Albert, et al. 2014) <sup>2</sup>                            |
| PhAN1                     | PhJAF13                        | -                       | 17.06±3.46                      | + | (Spelt, et al. 2002; Quattrocchio, et al. 2006; Albert, et al. 2014) <sup>3</sup> |
| PhAN1                     | PhAN2                          | +                       | 47.21±5.22                      | + | (Albert, et al. 2014)                                                             |
| PhAN1                     | PhAN4                          | +                       | 50.39±7.63                      | + | This work                                                                         |
| PhAN1                     | PhPH4                          | w                       | 51.89±8.89                      | + | (Quattrocchio, et al. 2006)                                                       |
| PhAN1                     | w/o                            | -                       | 0.49±0.05                       | - | (Quattrocchio, et al. 2006)                                                       |
| PhJAF13                   | PhAN11                         | A                       | 31.80±4.51                      | + | (Albert, et al. 2014)                                                             |
| PhJAF13                   | PhAN1                          | A                       | 5.77±0.54                       | + | (Spelt, et al. 2002; Albert, et al. 2014)                                         |
| PhJAF13                   | PhJAF13                        | A                       | 8.99±1.26                       | + | (Spelt, et al. 2002; Quattrocchio, et al. 2006; Albert, et al. 2014)              |
| PhJAF13                   | PhAN2                          | A                       | 48.26±8.02                      | + | (Albert, et al. 2014)                                                             |
| PhJAF13                   | PhAN4                          | A                       | 51.39±8.81                      | + | This work                                                                         |
| PhJAF13                   | PhPH4                          | A                       | 50.73±6.53                      | + | (Quattrocchio, et al. 2006)                                                       |
| PhJAF13                   | w/o                            | A                       | 0.50±0.04                       | - | (Quattrocchio, et al. 2006)                                                       |
| PhAN2                     | PhAN11                         | A                       | 0.59±0.00                       | - | This work                                                                         |
| PhAN2                     | PhAN1                          | A                       | 18.17±0.66                      | + | This work                                                                         |
| PhAN2                     | PhJAF13                        | A                       | 26.08±6.27                      | + | This work                                                                         |
| PhAN2                     | PhAN2                          | A                       | 0.55±0.03                       | - | This work                                                                         |
| PhAN2                     | PhAN4                          | A                       | 0.56±0.04                       | - | This work                                                                         |
| PhAN2                     | PhPH4                          | A                       | 0.59±0.03                       | - | This work                                                                         |
| PhAN2                     | w/o                            | A                       | 0.47±0.06                       | - | This work                                                                         |

|       |         |   |            |   |           |
|-------|---------|---|------------|---|-----------|
| PhAN4 | PhAN11  | A | 0.55±0.02  | - | This work |
| PhAN4 | PhAN1   | A | 19.65±2.43 | + | This work |
| PhAN4 | PhJAF13 | A | 32.21±4.02 | + | This work |
| PhAN4 | PhAN2   | A | 0.58±0.02  | - | This work |
| PhAN4 | PhAN4   | A | 0.57±0.02  | - | This work |
| PhAN4 | PhPH4   | A | 0.58±0.01  | - | This work |
| PhAN4 | w/o     | A | 0.48±0.05  | - | This work |
| PhPH4 | PhAN11  | A | 0.57±0.04  | - | This work |
| PhPH4 | PhAN1   | A | 31.94±6.10 | + | This work |
| PhPH4 | PhJAF13 | A | 42.77±4.48 | + | This work |
| PhPH4 | PhAN2   | A | 0.58±0.03  | - | This work |
| PhPH4 | PhAN4   | A | 0.56±0.01  | - | This work |
| PhPH4 | PhPH4   | A | 0.59±0.03  | - | This work |
| PhPH4 | w/o     | A | 0.50±0.01  | - | This work |
| w/o   | PhAN11  | - | 0.55±0.03  | - | This work |
| w/o   | PhAN1   | - | 0.60±0.02  | - | This work |
| w/o   | PhJAF13 | - | 0.62±0.05  | - | This work |
| w/o   | PhAN2   | - | 0.59±0.03  | - | This work |
| w/o   | PhAN4   | - | 0.52±0.02  | - | This work |
| w/o   | PhPH4   | - | 0.58±0.01  | - | This work |
| w/o   | w/o     | - | 0.47±0.03  | - | This work |

The proteins were single-expressed in human cells (HEK293TN) and immunoprecipitated with IgG Dynabeads.

Data are mean ± s.d. (n = 3).

w/o: Empty vector without CDS fusion.

+: Positive interaction (Luciferase activity ≥ 2.5%)

w: Weak interaction (Few colonies grew on SD-L/W/H with 3-AT or Luciferase activity = 1.5% ~ 2.5%)

-: No interaction (Luciferase activity < 1.5%)

A: Autoactivation

<sup>1</sup> In the references (Albert, et al. 2014), the interaction between PhAN11 and PhAN2 was not supported in the yeast experiment.

<sup>2</sup> In the references (Spelt, et al. 2002; Albert, et al. 2014), PhAN1 homodimerization was not clearly supported in yeast experiments.

<sup>3</sup> In the references (Spelt, et al. 2002; Quattrocchio, et al. 2006; Albert, et al. 2014), positive interaction was confirmed in yeast two hybrid.

**Table S8. Pairwise interaction of MBW components in Maize (*Z.mays*)**

| <b>BD or ProtA fusion</b> | <b>AD or Luciferase fusion</b> | <b>Yeast two hybrid</b> | <b>Pulldown/input ratio (%)</b> |   | <b>References</b> |
|---------------------------|--------------------------------|-------------------------|---------------------------------|---|-------------------|
| ZmPAC1                    | ZmPAC1                         | -                       | 0.67±0.00                       | - | This work         |
| ZmPAC1                    | ZmMP1                          | -                       | 0.65±0.02                       | - | This work         |
| ZmPAC1                    | ZmR(Lc)                        | +                       | 10.97±1.33                      | + | This work         |
| ZmPAC1                    | ZmR(S)                         | +                       | 10.34±0.71                      | + | This work         |
| ZmPAC1                    | ZmB                            | +                       | 10.84±0.49                      | + | This work         |
| ZmPAC1                    | ZmC1                           | +                       | 0.61±0.07                       | - | This work         |
| ZmPAC1                    | ZmPL                           | +                       | 0.52±0.05                       | - | This work         |
| ZmPAC1                    | ZmP1                           | +                       | 0.51±0.04                       | - | This work         |
| ZmPAC1                    | w/o                            | -                       | 0.49±0.07                       | - | This work         |
| ZmMP1                     | ZmPAC1                         | -                       | 0.62±0.08                       | - | This work         |
| ZmMP1                     | ZmMP1                          | -                       | 0.65±0.02                       | - | This work         |
| ZmMP1                     | ZmR(Lc)                        | -                       | 0.70±0.12                       | - | This work         |
| ZmMP1                     | ZmR(S)                         | -                       | 0.63±0.03                       | - | This work         |
| ZmMP1                     | ZmB                            | -                       | 0.64±0.09                       | - | This work         |
| ZmMP1                     | ZmC1                           | -                       | 0.66±0.07                       | - | This work         |
| ZmMP1                     | ZmPL                           | -                       | 0.56±0.15                       | - | This work         |
| ZmMP1                     | ZmP1                           | -                       | 0.51±0.08                       | - | This work         |
| ZmMP1                     | w/o                            | -                       | 0.47±0.05                       | - | This work         |
| ZmR(Lc)                   | ZmPAC1                         | A                       | 18.38±0.75                      | + | This work         |
| ZmR(Lc)                   | ZmMP1                          | A                       | 0.67±0.04                       | - | This work         |
| ZmR(Lc)                   | ZmR(Lc)                        | A                       | 9.63±0.84                       | + | This work         |
| ZmR(Lc)                   | ZmR(S)                         | A                       | 9.36±1.09                       | + | This work         |
| ZmR(Lc)                   | ZmB                            | A                       | 2.22±0.19                       | w | This work         |
| ZmR(Lc)                   | ZmC1                           | A                       | 48.68±2.07                      | + | This work         |
| ZmR(Lc)                   | ZmPL                           | A                       | 59.56±3.95                      | + | This work         |
| ZmR(Lc)                   | ZmP1                           | A                       | 0.52±0.09                       | - | This work         |
| ZmR(Lc)                   | w/o                            | A                       | 0.49±0.06                       | - | This work         |
| ZmR(S)                    | ZmPAC1                         | A                       | 19.86±1.81                      | + | This work         |
| ZmR(S)                    | ZmMP1                          | A                       | 0.64±0.07                       | - | This work         |
| ZmR(S)                    | ZmR(Lc)                        | A                       | 8.44±0.84                       | + | This work         |

|        |         |   |            |   |                                                                     |
|--------|---------|---|------------|---|---------------------------------------------------------------------|
| ZmR(S) | ZmR(S)  | A | 10.29±1.40 | + | (Feller, et al. 2006; Kong, et al. 2012)                            |
| ZmR(S) | ZmB     | A | 2.16±0.15  | w | This work                                                           |
| ZmR(S) | ZmC1    | A | 56.41±8.36 | + | (Grotewold, et al. 2000; Hernandez, et al. 2004; Kong, et al. 2012) |
| ZmR(S) | ZmPL    | A | 39.57±4.51 | + | (Grotewold, et al. 2000; Hernandez, et al. 2004)                    |
| ZmR(S) | ZmP1    | A | 0.53±0.10  | - | (Grotewold, et al. 2000; Hernandez, et al. 2004)                    |
| ZmR(S) | w/o     | A | 0.50±0.05  | - | This work                                                           |
| ZmB    | ZmPAC1  | + | 12.51±1.20 | + | This work                                                           |
| ZmB    | ZmMP1   | - | 0.63±0.12  | - | This work                                                           |
| ZmB    | ZmR(Lc) | w | 3.56±0.06  | + | This work                                                           |
| ZmB    | ZmR(S)  | - | 3.39±0.06  | + | This work                                                           |
| ZmB    | ZmB     | - | 3.90±0.09  | + | This work                                                           |
| ZmB    | ZmC1    | - | 0.66±0.16  | - | (Goff, et al. 1992; Hernandez, et al. 2004) <sup>1</sup>            |
| ZmB    | ZmPL    | - | 0.58±0.14  | - | (Goff, et al. 1992) <sup>1</sup>                                    |
| ZmB    | ZmP1    | - | 0.49±0.06  | - | This work                                                           |
| ZmB    | w/o     | - | 0.51±0.05  | - | This work                                                           |
| ZmC1   | ZmPAC1  | w | 0.61±0.05  | - | This work                                                           |
| ZmC1   | ZmMP1   | - | 0.63±0.02  | - | This work                                                           |
| ZmC1   | ZmR(Lc) | + | 35.56±3.66 | + | This work                                                           |
| ZmC1   | ZmR(S)  | - | 44.54±5.60 | + | (Grotewold, et al. 2000; Hernandez, et al. 2004; Kong, et al. 2012) |
| ZmC1   | ZmB     | - | 1.73±0.19  | - | (Goff, et al. 1992; Hernandez, et al. 2004) <sup>1</sup>            |
| ZmC1   | ZmC1    | + | 0.52±0.16  | - | This work                                                           |
| ZmC1   | ZmPL    | + | 0.52±0.14  | - | This work                                                           |
| ZmC1   | ZmP1    | - | 0.53±0.06  | - | This work                                                           |
| ZmC1   | w/o     | - | 0.53±0.01  | - | This work                                                           |
| ZmPL   | ZmPAC1  | A | 0.65±0.02  | - | This work                                                           |
| ZmPL   | ZmMP1   | A | 0.60±0.05  | - | This work                                                           |
| ZmPL   | ZmR(Lc) | A | 47.19±3.91 | + | This work                                                           |
| ZmPL   | ZmR(S)  | A | 46.37±4.45 | + | (Grotewold, et al. 2000; Hernandez, et al. 2004; Kong, et al. 2012) |
| ZmPL   | ZmB     | A | 0.63±0.18  | - | (Goff, et al. 1992; Hernandez, et al. 2004) <sup>1</sup>            |
| ZmPL   | ZmC1    | A | 0.57±0.14  | - | This work                                                           |
| ZmPL   | ZmPL    | A | 0.53±0.10  | - | This work                                                           |
| ZmPL   | ZmP1    | A | 0.53±0.12  | - | This work                                                           |

|      |         |   |           |   |                                                     |
|------|---------|---|-----------|---|-----------------------------------------------------|
| ZmPL | w/o     | A | 0.52±0.05 | - | This work                                           |
| ZmP1 | ZmPAC1  | - | 0.63±0.05 | - | This work                                           |
| ZmP1 | ZmMP1   | - | 0.57±0.09 | - | This work                                           |
| ZmP1 | ZmR(Lc) | - | 0.59±0.11 | - | This work                                           |
| ZmP1 | ZmR(S)  | - | 0.65±0.09 | - | (Grotewold, et al. 2000;<br>Hernandez, et al. 2004) |
| ZmP1 | ZmB     | - | 0.63±0.08 | - | This work                                           |
| ZmP1 | ZmC1    | - | 0.66±0.16 | - | This work                                           |
| ZmP1 | ZmPL    | + | 0.55±0.12 | - | This work                                           |
| ZmP1 | ZmP1    | - | 0.49±0.06 | - | This work                                           |
| ZmP1 | w/o     | - | 0.50±0.05 | - | This work                                           |
| w/o  | ZmPAC1  | - | 0.61±0.09 | - | This work                                           |
| w/o  | ZmMP1   | - | 0.56±0.05 | - | This work                                           |
| w/o  | ZmR(Lc) | - | 0.62±0.10 | - | This work                                           |
| w/o  | ZmR(S)  | - | 0.60±0.08 | - | This work                                           |
| w/o  | ZmB     | - | 0.62±0.02 | - | This work                                           |
| w/o  | ZmC1    | - | 0.65±0.08 | - | This work                                           |
| w/o  | ZmPL    | - | 0.55±0.06 | - | This work                                           |
| w/o  | ZmP1    | - | 0.53±0.04 | - | This work                                           |
| w/o  | w/o     | - | 0.51±0.02 | - | This work                                           |

The proteins were single-expressed in human cells (HEK293TN) and immunoprecipitated with IgG Dynabeads. Data are mean ± s.d. (n = 3).

w/o: Empty vector without CDS fusion.

+: Positive interaction (Luciferase activity ≥ 2.5%)

w: Weak interaction (Few colonies grew on SD-L/W/H with 3-AT or Luciferase activity = 1.5% ~ 2.5%)

-: No interaction (Luciferase activity < 1.5%)

A: Autoactivation

<sup>1</sup> In the references (Goff, et al. 1992; Hernandez, et al. 2004), positive interaction was confirmed in yeast two hybrid.

**Table S9. MBW CDS sequence information**

| Gene Name     | Sequence                                                                                                                                                                                                                                                                                                                                                                                                                                                                                                                                                                                                                                                                                                                                                                                                                                                                                                                                                                                                                                                                                                                                                                  |
|---------------|---------------------------------------------------------------------------------------------------------------------------------------------------------------------------------------------------------------------------------------------------------------------------------------------------------------------------------------------------------------------------------------------------------------------------------------------------------------------------------------------------------------------------------------------------------------------------------------------------------------------------------------------------------------------------------------------------------------------------------------------------------------------------------------------------------------------------------------------------------------------------------------------------------------------------------------------------------------------------------------------------------------------------------------------------------------------------------------------------------------------------------------------------------------------------|
| <i>AtTTG1</i> | <p>ATGGATAATTCAGCTCCAGATTTCGTTATCCAGATCGGAAACCGCCGTCACATACGACTCACCATATCC<br/> ACTCTACGCCATGGCTTTCTCTTCTCCGCTCATCTCCGGTACACAGAATCGCCGTCGGAAGCTTCTCT<br/> CGAAGATTACAACAACCGCATCGACATTTCTCTTTTCGATTCCGATTCAATGACCGTTAAGCCTCTCCC<br/> GAATCTCTCCTTCGAGCATCCTTATCCTCCAACAAAGCTAATGTTTCAGTCTCTCTCTCCGTCGTCC<br/> TTCCTCCGGAGATCTCTCGCTTCTCCGGCGATTTCCTCCGCTTTGGGAAATTAACGAAGATTCATC<br/> AACCCTCGAGCCAATCTCGGTTCTCAACAACAGCAAAACGAGCGAGTTTTGTGCGCCGTTGACTTCTCT<br/> TCGATTGGAACGATGTAGAGCCGAAACGCTCGGAACTGTAGTATTGATACGACGTGACGATTTGG<br/> GATATTGAGAAGTCTGTTGTTGAGACTCAGCTTATAGCTCATGATAAAGAGGTTTCATGACATTGCTTG<br/> GGGAGAAGCTAGGGTTTTTCGCATCAGTCTCTGCTGATGGATCCGTTAGGATCTTTGATTTACGTGATA<br/> AGGAACATTTACAATCATTACGAGAGTCTCAGCCTGATACGCCTTTGTAAAGACTTGCTTGGAAAC<br/> AAACAAGATCTTAGATATATGGCTACGATTTTGTAGGATTCTAATAAGGTTGTGATTCTCGATATTCTG<br/> TTCGCGACTATGCCTGTGCTGAGCTTGAAAGACATCAGGCTAGTGTGAATGCTATAGCTTTGGGCGC<br/> CTCAGAGCTGTAACATATTTGTTCTGGTGGTGTATGATACACAGGCTCTTATTTGGGAGCTTCTACTG<br/> TTGCTGGACCAATGGGATTGATCCGATGTCGGTTTTATTTCGGCTGGTTCGGAGATTAATCAGTTGCGAG<br/> TGGTCTTCTTCGACGCTGATTGGATTGGTATTGCTTTTGCTAACAAAATGCAGCTCCTTAGAGTTTGA</p>                    |
| <i>AaTTG1</i> | <p>ATGGATAACTCAGCTCCAGATTTCGTTATCCAGATCGGAAACCGCCGTCACCTACGAGTCTCCTTATCC<br/> ACTCTACGCAATGGCTTTCTCTTCTACAGCGCCGGTACATCTTCCGGTACACAGAATCGCCGTCGGTATG<br/> CTTCTTAGAAGATTACAACAACCGTATCGATATTTCTACCTTCGATTCCGATTCCATGACTATCAAATC<br/> TCTCCGAATCTATCCGTCGATCCTTATCCTCCAACAAAGCTAATGTTTCAGTCTCATGATAAAGACTTCC<br/> TCGCTCTTCCGCCGAGATCTACTCGCTTCTCCGGTGTATTTCTCCGTTTATGGGAGGTTAACGAAGA<br/> TTCATCCACCGTTGAGCCTGTTCGGGTGCTTAACAATAGTAAGACGAGTGAGTTTTGTGCGCCGTTGA<br/> CTTCCCTTTGATTGGAACGATGTTGAGCCGAAACGACTCGGGACTGTAGTATTGATACGACTGTGACG<br/> ATTTGGGATATTGAGAAATCTGTGAGCTGAGCTCAGCTTATAGCTCATGATAAAGACTTACATAGCAT<br/> TGCTTTGGGAGAAGCTAGGGTTTTTCGCTTCGGTTTTCTGCTGATGGATCAGTGAGAATCTTTGATTTAC<br/> GTGATAAGGAACATTCAACAATCATATACGAGAGTCTCAGCCTGATACGCCTCTTAAAGACTAGCT<br/> TGGAACAAGCAAGATTTGAGATACATGGCTACGATTTCTTATGGATTCTAATAAGGTTGTGATTCTTGA<br/> TATTCGTTACCGACTATGCCTGTTGCGGAGTTAGAAAGGCATCAGGCTAGTGTAAAGACTTATAGCTT<br/> GGGCTCCACAGAGCTGTAACATATTTGCTCTGGTGGTGTATGATACACAGGCTTTGATTTGGGAGTTA<br/> CCGACTGTGCTGGACCTAATGGGATTGATCCTATGTCCGTTTACTCGGCTGGCTCGGAGATTAATCA<br/> GTTGCAGTGGTCTTCTTACAGCCTGATTGGATTGGCATTGCTTTTGCTAACAAAATGCAGCTCCTTAG<br/> AGTTTGA</p> |
| <i>GhTTG1</i> | <p>ATGGAGAATTCAACTCAGGAATCCCACCTCCGATCCGATAACGCCGTAACCTACGAATCACCTACCC<br/> ACTCTACGCCATGGCCTTATCTTCCACGCCCGCCGTCACCCATCTCACTACCAACGCATCGCTCTCCG<br/> CAGTTTACGAGGATTACACTAACAGAGTCCACAAATCTCTTTCGACCCTGAATCACTACCTACCTCAT<br/> AACCACCCATCTTTGTCGTTTCGACCACCTTACCACCCACCAAATTTATGTTCCAACCCACCCGGA<br/> AATCCCTTTCTTCTCTCCTCCGACCTCCTCGCTTATCCGGTACTACCTCCGCTCTTGGGAAGTTG<br/> GGCCTTCTTATCGAACTTATCTCCGTTCTCGACAACAGCAAAACCAGCGAGTTTTCTGCTCCCTTAA<br/> CTTCTTCGATTGGAACGACGTTGAAACCCAAATAGAATCGGAACATCCAGACACCACTCCGACCC<br/> ATTTGGGACATTGAAAAAGGCGTTGTGGAAACCCAATTGATTGCTCACGACAAGGAGGTTTACGACA<br/> TCGCTTGGGGTGAAGGTAGAGTTTTTCGGTTCCGTTTCCGCTGATGGGTCCGTAAGGATTTTCGATTAA<br/> GGGACAAAGAACACTCAACTATCATCTACGAAAGCCCTCAACCGGACACCCCTTTGCTAAGATTAGC<br/> TTGGAACAAACAAGATTTGAGGTATATGGCTACGACACTAATGGATAGCAATAAAGTTGTGATTTTG<br/> GACATAAGGTCGCTACTACGCCGTTGGCTGAGTTGGATAGACATGGAGCCAGTGTCAATGCGATTG<br/> CTTGGGCTCCCCAGAGCTGTAAGCACATTTGCTCTGCAGGGGATGATACGCATGCCCTTATTTGGGAG<br/> TTACCAACTGTAGCTGGGCCTAACGGAATCGATCCTTTGTCTATGTACTCGGCTAGTTCGGAATTA<br/> TCAGTTGCAGTGGTCTGCTGCTCAGCCTGATTGGATTGCCATTGCCTTCTCCAACAAAATGCAGCTTCT<br/> CAAAGTTTGA</p>                  |
| <i>GhTTG2</i> | <p>ATGGCCGCTAGCAGCGATCTAACCCGGAGGGTTCCGATGAGCAGCAGAAACGATCCGAGATATACA<br/> CTTACGAGGCCCTTGGCATACTACGCCATGAACTGGAGTGTCCGCCGACAAAGAAATACCGTCTC<br/> GCCATCGCCAGCTTGTCTGAGCATTACAACAACCGCCTTGAGATTGTCCAGCTCGATGACTCCAATGG<br/> CGAGATCCGATCGGACCCAAATCTCTCCTTCGATCATCCTTATCCCCGACCAAGACCATCTTCATCCC<br/> CGACAAGGAGTGCCAGAAACCCGACCTTCTCGCCACGTCCTCCGACTTCTCCGCATTTGGCGCATCT<br/> CCGATGACCACTCCCGCTGACCTCAAGTCTCTCCTAATGGCAATAAGAACAGTGAATTCTGCGGT<br/> CCTCTTACCTCTTCGACTGGAATGAGGCGGAGCCCAAGCGAATCGGCACCTCTCCATTGATACGAC<br/> TTGACTATATGGGATATCGAGAGGGAGACGGTGGATACCCAGCTTATCGCCACGATAAAGGAGGTT<br/> TATGATATTGCTGGGGCGGCTCGGTGTTTTGCTTCCGCTCTGCTGATGGGTCCGTTAGGGTTTTTC<br/> GACCTGCGGACAAGGAGCACTCCACTATCATTTATGAAAGTTCCGAGCCGATACTCCGCTTGTACG<br/> GTTGGGGTGGAAACAAGCAGGACCCGAGATATATGGCTACTATAATTATGGACAGTGTAAAGGTTGTT<br/> GTTTTGGATATCCGCTTCCCGACTGCCGGTAGTTGAGCTGCAGAGGCACCAGGCTAGCGTCAATGC<br/> CATCGCATGGGCAACCCACAGCTTTGCCACATTTGCACCGCCGGGGATGATTCCAGGCCTTGATTT<br/> GGGACTTGTCTCCATGAGTACGCTGTGGAGGGTGGGCTTGACCCATCCTTGCTACACCGCTGGG<br/> GCTGAAATCGAGCAGTTACAGTGGTTCATCTCCAGCCTGATTGGGTTGCCATCGCCTTCTCCACAA<br/> GCTTACAGATTCTCAGGGTATGA</p>                 |

*GhTTG3*

ATGGAGAATTCAACTCAAGAATCCCACCTGAGATCCGATAATTCGGTAACTACGAATCAGCTTACAC  
AGTTTATGCCATGGCCTTATCTTCCACGCCTTCTCCACCAATATCAACCATCAACGCATCGCTCTCGG  
CAGCTTCTCGAAGATTACACTAACAGAGTCGACATAATCTCATTGATCCAGAAACCTCTCCTTCA  
AGACCCACCCAAAGCTTGCCTTCGACCACCCTTATCCACCCACCAAGCTCATGTTCCAACCCAATCGA  
AAATCCGCTTCATCCTTCTTCTTGTTCGGATCTTCTCGCTTCAACCGGCGATTTCCTCGCTCTCGGG  
AAGTTCGAGAATCTTCCATTGAACTGTACTGTTCTAAACAATAGCAAAAACAGCGAGTTTTGTGCC  
CCGTTAACTTCTTCGATTGGAACGATGTTGAACCCAAGAGAATTGGGACTTCCAGCATCGACACAAC  
TTGCACCAATTTGGGACATCGAGAAAATGCGTCTGTTGAAACCCAATTGATCGCTCATGATAAAGAGGTTT  
ACGACATTGCTTGGGGTGAAGCTAGAGTTTTTGTCTCCGTTTCCGCTGATGGGTCCGTTAGGATTTTCG  
ATTTGAGAGACAAAAGAACATTCCACCATCATTATGAAAAGTCCCAACCCGACACCCCTTTATTAAGA  
TTGGCTTGAACAAGCAAGATTTGAAGTATATGGCTACCATTCAAATGGATAGCAATAAAGTTGTGAT  
TTGGATATAAGGTCACCCACAACCCCGTTGCTGAGTTGGAGCGGCATCACGCTAGTGTCAATGCCA  
TTGCCTGGGCTCCTCAGAGTTGTAAGCATAATTTGTTCCGCTGGGGATGATACCCAGGCTCTTATTTGGG  
AGTTGCCTACGGTGGCGGGACCTAATGGTATCGATCCTCTGTGTGTTACTCTGCTGGCTACGAAATT  
AATCAATTACAGTGGTCTGCTGCGCAACCTGATTGGATTGCCATTTGCCATTTTCCAACAAATTGCAGCTT  
CTCAAAGTTGA

*GhTTG4*

ATGACGGCCACCAGCGATCCGAACCCCGAAGTTTCCGACGAGCAGCAAAAACGATCGGAGATATACA  
CATATGAAGCTCCCTGGTACATCTACGCTATGAATTGGAGCGTCCGCGCGACAAAAAGTACCGACTC  
GCCATCGCCAGCCTCCTCGAGCAATACCCTAACCGTCTCCAGATTGTTCAACTCGACGACTCCAATGG  
TGAGATCCGGTCCGATCCCAACCTCTCCTTCGACCATCCCTATCCCGCTACTAAGACCATCTTCATTCC  
CGACAAGGATTGCCAGAAACCCGATCTTCTCGCTACCTCCTCCGATTTTCTTCGATATGGCGGATCTC  
GGATGACGGTCCCGCGTTGACCTCAAATCGCTCCTTAATGGCAATAAGAACAGTGAATTTTGGCGTC  
CTCTCAGCTTTTTCGACTGGAACGAGGCGGAGCCGAAGCAATCGGGACTTCTCCTATTGATACGACT  
TGCATATTTGGGATATCGAGAAGGAAACAGTGGATACCCAGTTAATTGCCACGATAAGGAGGTTT  
ACGACATCGCTTGGGGTGGAGTTGGGGTTTTCGCTTCCGCTCCGCGGACGGTTCGGTTAGGGTTTTCG  
ATTTACCGCAAGGAACATTCGACGATCATCTACGAGAGTTCGGAGCCGGACGCGCCGCTGGTGGC  
GTTGGGGTGGAAACAAGCAGGACCCAGATATATGGCGACCATTATAATGGATAGTCCAAAGGTGGTT  
GTTTTGGATATCCGTTTCCCGACGTTGCCGGTGGTTGAGTTGCGGAGACACCAGGCGAGCGTCAATGC  
CGTCGCTTGGGCTCCCAATAGTTCCTGCCACATTTGCCCGCGGCGATGATTCTCAGGCGTTGATTTG  
GGATTTGTCTTCGATGGGTCAGCCTGTTAAAGGTGGGCTTGACCCATTCTTGCATACACGGCTGGGG  
CTGAAATTGAACAGTTGCAATGGTCTGCTCAGCCTGATTGGGTGGCCATTGCCCTTCTCCACTAAG  
CTTCAGATTCTAAGGGTATGA

*PhAN11*

ATGGAAAATTCAAGTCAAGAATCACAACATCTCCGATCTGAAAACCTCCGTTACATATGATTCCACTTA  
CCCAATTTACTCCATGGCATTTCCTCTTCCCAACCCCGCCGCGCATGCGGTGGGTAGCTTTAT  
TGAAGAATTAACAACCGGGTGAACCTCTTTTCAATTAATGAAGAAACCCCTAACCCCTAAACCAATCC  
CAAATCTTTCTTTTGGATCATCCATACCCCAACTGAAATTAATGTTCCATCAACCCCAAAAATCCA  
ATAATGACATTTCTGCTTCTCAGGTGATTATTTGCGTTTTATGGGAAGTTAAAGAAAGTTCAATTGAA  
CCCCTTTTACTTTAAATAATAGTAAACTAGTGAATATGTGCCCTTTAACTTCTTTGATTGGAAAT  
GAAGTTGAGCCTAAAAGAATTGGTACTTCTAGTATTGATACTACTTGTACTATTTGGGATGTCGAAAA  
GGGCGCTTGAACACTCAGTTAATTGCTCATGATAAAGAGGTTATGATATTGCTTGGGGTGAAGCTG  
GTGTTTTGTCATCTGTTCTGCTGATGGATCGGTTAGGATTTTCGATTTAAGAGATAAAGGAGCATCGA  
CGATTATTTATGAGAGTCCAACGCTGATACTCCGTTGTTGAGGTTGGCGTGAATAAGCAAGATTTG  
AGATATATGGCTACTATATGATGGATAGTAATAAGGTTGTGATTTTAGATATTAGGTCGCTGCTAT  
GCCTGTGGCGGAGTTGGAAGGCATCAGGCGAGTGAATGCCATTGCTTGGGCTCCCCAGAGTTGT  
AGACATATTTGTTCAAGGTGGAGATGATGGGCAGGCGTTGATTTGGGAGTTGCTACTGTTGTGCGCC  
TAATGGGATTGATCCCATGTCGATGTACTCTGCTGGTGTGAGATTAATCAGCTTCAGTGGTCTCCTGC  
GCAGCGTATTGGATTGCTATTGCATTTCTAACAAGTTGCAATTGCTTAAAGTATAG

*ZmPAC1*

ATGGACCCACCCAAGCCGCCGCTCCTCGGTCGCTCGTCTCGGGCCGGAGACGCCGAACCCGCACG  
CCTTCACTGCGAGCTCCCGACTCGATCTACGCGCTCGCCTTCTCCCCGTCGCGCCCGTCTCGCCT  
CCGGCAGCTTCTCGAGGACCTCCACAACCGCTTCCCTGTCTCCTTCGACCCCGTCCGCCCTCCG  
CCGCTCCTTCCGCGCCCTCCCGGCGTCTCCTTCGACCACCCTTACCACCCACCAAGCTCCAGTTCA  
ACCCCGCGCCGCGCGCCGCTCCTCCTCGCTCCTCCGCGGACACGCTCCGCATCTGGCACACCCCG  
CTCGACGACCTTCCGACACCCGCCCGCCGAGCTCCGCTCCGTTCTCGACAACCGCAAGGCCCTC  
CTCCGATTCTGCGCACCCCTCACCCTCTCGATTGGAACGAGGTCGAGCCCGCCGATCGGGACCG  
CCTCCATCGACACCACCTGCACCGTCTGGGACATCGATCGCGGGGTCGTGGAGACGCAAGCTCATCG  
GCACGACAAGGCCGTGCACGACATCGCTGGGGGGAGGCCGGGTTCTTCGCTCCGATCGGCCGAC  
GGCTCCGTCGCGCTTTCGACCTTCGGGACAAGGAGCACTCCACCATCGTCTACGAGAGCCCCCGCC  
CGACACGCCGCTACTAAGGCTGGCGTGAACCCGCTTGACCTCCGCTATATGGCCGCGTGTCTATGG  
ACAGCAGCGCCGTCGCTGCTCGACATACGTGCGCCCGGGGTGCCGTTGGCCGAGTGCACCCGCA  
CCGGGCGTGCCCAACGCAGTCCGCTGGGCGCCGAAGCCACTAGGCACCTCTGTTCCGGTGGGGAC  
GACGGGCAAGCATTGATCTGGGAACTGCCTGAGACGGCGCGGCTGTACCCGCCGAGGGGATTGATC  
CTGTGCTAGTGTACGATGCAGGCGCCGAAATAAACCACCTTCAAGTGGCGCCGCGCACCCGGACTG  
GATGGCCATCGCCTTTGAGAACAAGTCCAGCTTCTTAGGGTCTAG

*ZmMPI*

ATGGGCGGAGTCGGCGAAGGTGACGCGTGGGCGGATCAGGAGCAGGGCAACGGCGGGGGCAGCCGT  
GGTGTGGCGGTGGCGGGCGGAGGCGAAGCGGTTCGGAGATCTACACGTACGAGGCCGCTGGCACA  
TCTACGCGATGAACTGGAGCGTGC GGCGCGATAAGAAATACCGCCTTGCCATCGCCAGCCCTCTCGA  
GCAGGTACCAACCGCGTTCGAGGTCGTCAGCTCGATGAGGCTCGGGTGACATCGCCCGCTCTCA  
CCTTCGACCATCAGTACCCGCCACCAAGACCAATGTTTCATGCGGGACCCGACGCGCTCCGCCCGAC  
CTGCTCGCCACCTCCGCCGACCACCTGCGCATCTGGCGCATCCCGTCTCCGACGACGCCGAGGACGG  
CGCCGCTCCGCCAACAACAACACGGCTCCGTCCGCTGCAACGGCACCCAGCAGCCGGGCATCGAG  
CTACGCTCCGAGCTCAACGGCAACCGCAACAGCGACTACTGCGGGCCGCTCACCTCTTCGACTGGA  
ACGACGCCGATCCGCGCCGCATCGGTACCTCCTCCATCGACACCACCTGCACAATCTGGGACGTCGAG  
CGCGAGGCCGTTGACACCCAGCTCATCGCCACGACAAGGAGGTCTACGACATCGCCTGGGGCGGCG  
CGGGGGTCTTTGCTCCGTCTCCGCCGACGGCTCTGTTGCGCTCTTTGATTTACGGGACAAGGAGCAC  
TCCACAATCATTTATGAGTCTGGTTCAGGTGGCAGCAGCGGGCGGGTTCAACTCTGGCGCCGGAGA  
TGGTGGGACTGCGTCCCGACACCACTCGTAGGTTGGGCTGGAACAAGCAGGACCAAGGTACATG  
GCCACCATCATGACAGCCCAAGGTGGTTGTGCTTATCCGCTACCCAACTGCCAGTGGT  
AGAGCTACACCGTACCATGCCCCTGTCAATGCCATTGCGTGGGCACCTCACTCTTCTGCCACATCT  
GCACAGCTGGGGATGACATGCAGGCACTGATATGGGATTGTGCTCTATGGGAACTGGTAGCAATGG  
CAGTGGCAATGGGAATGGTAACACAGCCGCTGGAGCAGCAGAGGGCGGTCTTGATCCCATTTG  
GCATATACGACAGGGGACAGAGATTGAGCAGTTGCGAGTGGCGGACCCAGCCTGACTGGGTGCA  
TCGCATTCGCCAATAAGCTTCAGATTCTCAGGGTCTGA

*AtGL3*

ATGGCTACCGGACAAAACAGAACAACCTGTGCCAGAGAATCTGAAGAAAACCTCGCAGTTTCAGTTC  
GAAACATTCAATGGAGTTATGGTATCTTTTGGTCTGTCTCTGCTTCTCAGTCTGGAGTTTLAGAATGGG  
GAGATGGATACTATAATGGAGATATCAAAAACGAGGAAGACGATTCAAGCTTCGGAGATCAAAGCTGA  
TCAGCTTGGTCTACGGAGGAGCGAGCAGCTTAGCGAGCTTTACGAGTCTCTCTCCGTCGCTGAATCTT  
CTTCTCAGGCGTTGCTGCCGGATCTCAAGTACCAGACGAGCTTCCGCCGCCGCACTTTACCGGAA  
GATCTCGCCGACACCGAGTGGTACTATTTGGTGTATGTTCTTTCGTTCAACTTGGTGAAGGAATG  
CCTGGACGGGACTTTGCAAACGGTGAACCGATATGGTTGTGCAACGCTCATAACGGCGGATAGTAAAG  
TGTTTAGCCGTTCTTCTAGCAAAAAGTGTGCTGCGGTTAAGACAGTGGTTTGGCTCCCGTCTCTGGAG  
GAGTCGTTGAGATTGGTACCACAGAACATATTACGGAAAGACATGAATGTAATAACAATGCGTGAAGAC  
ATCATCTCAGAACCCCTGATCCGTACGCTACAATATTACCAGCAAGATCCGATTATCACATCGACA  
ACGTTCTTGATCCGCAACAGATTCTAGGCGACGAGATTACGCGCTATGTTACGATACGGAGCCTTTT  
CCAACAGCTTCTCCGAGCAGAACTACCAACGGTTTCGATCAAGAACATGAACAAGTAGCAGATGATC  
ATGATTCTTTCATGACCGAAAAGAACTACTGAGGAGGACTTCTCAGGTGCAAAAGCTGGCAGCTCATGGA  
CGACGAGCTTAGTAACCTGCGTTCACCAAGTCCGTTAAATCCAGCGATTGCGTCTCAAAACGTTTGTG  
AAGGGCGGCTGGACGGGTTGCTTACGGTCAAGAAAAGAGTAGAGTTCAAGTACAGGCAAAATTC  
AAGAGCAACAGAGAAATGTGAAGACATTTGCATTTGATCCAAGAAAACGACGACGTTTATTACCAAAG  
TGTGATCTCAACGATTTTAAAGACCAACCATCAGTTAATCTCGGACCGCAGTTTCGAAACTGCGATA  
AACAGTCAAGCTTCACTAGGTGGAAGAAATCATCGTCATCATCATCAGGAACCGCCACGGTACCGGC  
ACCATCACAAGGAATGTTAAAGAAAATTAATTTTCGATGTTCCGCGAGTGCACCAAGAAAGAGAAATTA  
ATGTTGGACTCACCAGAAGCCAGAGATGAAAACCTGGGAACCATGCGGTTTATAGAGAAGAAGCGCCGG  
AGAAATGAACGAACGGTTCATGACCTTGAGAAAATCATTCCGTCATCAACAAGATCGATAAAGT  
ATCGATTCTTGACGATACGATAGAGTATCTTCAAGAACCTCGAGAGACGGGTTCAAGAATAGAATCTT  
CGAGAGAATCAACCGATACAGAGACTCGTGGGACGATGACGATGAAGAGGAAGAAACCTACGACG  
CAGGAGAAAGAACATCAGCTAATTGCGCAAAATAATGAAACAGGAAATGGGAAGAAGGTGTCGGTTA  
ACAATGTTGGTGAAGCCGAGCCAGCAGATACCGGTTTACTGGTTAACCAGATAATTTAAGGATCGGT  
TCGTTTGGTAATGAGGTGGTTATTGAGCTTAGATGTGCTTGGAGAGAAGGAGTATTGCTTGAGATAAT  
GGATGTGATTAGTGATCTCCATTTGGATTCTCATTCCGTTCAATCCTCGACCCGAGACGGTTTGTCTGT  
CTTAACCGTCAATTGCAAGCACAAGGGGTCAAAAATAGCGACACCAGGAATGATCAAAGAAGCACTT  
CAAAGGGTTCATGGATCTGTTGA

*AtEGL3*

ATGGCAACCGGAGAAAAACAGAACGGTGC CGGACAATCTAAAGAAAACAGCTCGCAGTTTCAGTTCGAA  
ACATTC AATGGAGTTATGGAATCTTCTGGTCTGTCTCTGCTTCTCAACCAGGAGTGTGGAGTGGGGA  
GATGGATATTACAATGGAGACATAAAGACAAGGAAGACGATTCAAGCAGCAGAAGTCAA AATTTGAC  
CAGTTAGGCTTTGAGAGAAGTGAGCAGCTTAGAGAGCTTTATGAATCTCTCTCCCTCGTGAATCCTC  
AGCTTCCGGTAGCTCTCAGGTCACTAGACGAGCTTCCGCCGCCGCTCTCACCGGAGGACCTCACCG  
ACACCGAGTGGTACTACTTAGTATGCATGTCTTTCGTTTCAACATCGGTGAAGGAATCCCCGGAGGA  
GCGTTATCCAATGGAGAACCAATATGGCTTTGTAACGCTGAAACCGCGGATAGCAAAGTCTTCACTCG  
TTCTCTTAGCTAAAAGTGTTCGTTTCAGACAGTGGTTTGTCTCCCGTTTCTTGGAGGAGTCCCTTGA  
GATGGCACGACCGAACATATTAAGAGGACATGAACGTGATACAAAAGTGAAGACGTTTTCCTT  
GAAGCTCCTCATATACTACAATATCGACAAGATCAGACTATCAAGAAAATTTTGTATCCCTTAAAGTGA  
CGATAAATACACTCCGGTGTATAAACCAGGCTTTTCCAACTTCTACTAGCGGGTTTGGACAAAG  
AACCTGAGGATCATGATTCGTTTCATCAACGATGGTGGTGCCTCAGGTACAAAGCTGGCAGTTTGTG  
GGTGAAGAAAATCAGTAACTGCATTCAACAATCGTTAAATTC AAGCGATTGCGTTTCCCAAACGTTTGT  
TGGAACAACCGGGAGACTTGTGCTGCGATCCAAGGAAGAGTAGGATTCAACGGTTAGGTGAGATTCAA  
GAACAGAGTAACCATGTAAATATGGACGACGATGTTTATTACCAAGCGGTGATATCGACGATTTTCA  
AAACAACGCATCAGCTAATACTCGGACCCGAGTTTCAGAACTTCGATAAGCGGTCTAGCTTCAACG  
GTGGAACGATCATCTGTGAAAACATTTGGGAGAGAAAATCGCAGAAGATGATAAAGAAAGATACTC  
TTCCAGGTTCTTTGATGAACAAGAAAAGAGTTGTTACCGGACACACAGGAGGAAACCGGAAACC  
ATGCCTTGTCCGAGAAGAAACCGCCGAGAAAATGAAATGAACGGTTTATGACATTGAGATCAATCAT  
TCCCTCAATTAGTAAGATTGATAAAGTGTGATTCTTGTATGATACAATTGAGTATCTTCAAGATTTAC  
GAAAACGGGTTCAAGAGTTGGAATCTGTAGAGAATCTGCTGATACAGAGACCGGATAACGATGAT  
GAAAGGAAGAAACCGGATGATGAGGAGGAAAGCAGTACAGCAATTGATGAACAAGGAAAGGA  
AGGGGAGTGTGTAATGTAGGAGAAGATGAACCAGCTGATATCGGTTATGCTGGTCTAACGGATAA  
CTTAAGGATCAGTTCATTAGGTAACGAGGTGGTATTGAGCTTAGATGCGCTTGGAGAGAAGGGATA  
TTGCTTGAGATAATGGATGTGATTAGTATCTCAACTTGGATTCTCACTCGGTTTCAGTCTCAACCGG  
AGACGGTTTACTCTGCTTAACTGTCAATTGCAAGCATAAAGGGACAAAATAGCAACAACAGGAATG  
ATCCAAGAGGCACTTCAAAGGGTTCATGGATATGTTAA



*AtMYC1*

ATGCTTTGACAATGGCTGATGGTGTAGAAGCTGCAGCAGGAAGAAGTAAAAGACAAAAACAGCTTAT  
TAAGAAAACAACCTTGCTTTAGCTGTAAGAAGTGTTCATGGAGCTACGCAATCTTCTGGTCGTCTTCA  
CTTACTCAACCTGGGGTTTTGGAGTGGGGAGAAGGATGTTACAATGGAGATATGAAGAAGAGGAAGA  
AGAGTTATGAATCTCATTATAAATATGGGTTGCAAAAAAGCAAGGAGCTTCGGAACTTTATTTGTCT  
ATGCTTGAAGGAGACAGTGGTACTACTGTTAGTACTACTCATGATAATCTCAATGATGATGATAA  
TTGTCACAGTACAAGTATGATGCTGTCACCAGATGACCTCTCTGATGAAGAGTGGTACTATTTAGTCT  
CCATGTCTATGTCTTCTCTCCTTACAATGTTTGCCTGGAAGAGCTTCAGCGACGGGTGAGACCATAT  
GGCTCTGCAACGCTCAATATGCGGAGAACAAGCTTCTCTCTGTTCTTTGTTAGCAAGAAGCGCATCA  
ATTCAGACTGTTGTGTGTTTCCCTTACTTGGGCGGAGTCATTGAGCTGGGCGTCACTGAATTGATTCA  
GAAGACCATAACCTGCTTCGAAACATCAAATCTTGCTTGATGGAATATCTGCACACCAAGACAACG  
ATGACGAGAAGAAGATGGAGATTAAGATCAGTGAAGAGAAGCATCAGCTTCCATTAGGATTTCTGA  
TGAAGACTTGCATTACAAAAGAACCATTTC AACAGTACTCAACTACTCCGCAGATAGATCAGGTAAG  
AACGATAAGAACATTCGTCATCGTCAGCCAATATTGTTACTTCTGAACCTGGCTCAAGTTTCTTGCG  
GTGGAAGCAATGTGAGCAGCAAGTCTCGGGTTTTGTTTCAGAAAAAAAAGTACAGAATGTGTGCGG  
AAGATATTGCATGATGTCCCTTTGATGTCACAAAAAGAGAATGTTCCCAAGTCAAGACTCTGGTCTGAA  
TCAAGATGATCCTTCAGATAGAAGAAAAGAGAACGAAAAGTTCAGTGTCTTGAAGTATGGTTCCTCC  
ACTGTCAACGAGTTGATAAAGAATCGATACTAAACACACAATCAAGTACCTGCAAGAAGTGGAGG  
CAAGAGTAGAAGAGCTAGAATCTTGTATGGGATCAGTTAATTTGTAGAAAAGACAAAAGAAAGACGC  
AGAGAACCCTAACGACTCTGTGTTGATCGAAGAGACATCAGGGAACATCGATGATGATGACGCAAGATC  
GATGACAATTCAGGAGAAAACCGAACAAGTCACTGTTTTTCAGAGATAAGACACATTTGAGAGTTAAAC  
TCAAAGAAAACAGAAGTTGTGATCGAAGTAAGATGTTCTTACAGAGACTACATAGTTGCGGACATCAT  
GGAAACTCTGAGCAATCTTACATGGATGCTTCTCTGTAGATCTCACACGCTCAATAAGTTCTCTAC  
ATTGAATCTCAAGGCCAAGTTTCGCGGGCTGCAAGTTGCGTCCGTAGGAATGTTACAGGATGATGAG  
AGAAGAGTCAATTGACTTTCTGTAACCGATATGCGATGTGCCATTATCTTTACATCAAGTTTTCAGGGT  
TTTTGTATGTAAGTTTGCCAAAGTTTGGTTGGAATTTTCGACAACGTTGTCTCTTCTCTTCTACAAA  
ACCAAGATCTATACTTATTCATAATTCATGGGCGATTTGTATCTTTCATTAA

*AtTT8*

ATGGATGAATCAAGTATTATTCGGCAGAGAAAAGTGGCCGGAGCTGAGAAAAAGAGCTTCAAGGG  
CTGCTTAAAGACGGCGGTTCAATCTGTGGACTGGACTTATAGTGTCTTCTGGCAATTTTGTCTCAACAA  
CGGGTCTTGGTGTGGGGGAATGGATACTACAACGGTCAATAAAGACGAGGAAGACAACCTCAACCA  
CGGGAGGTGACGGCAGAAGAGGGCGGCTTAGAGAGGAGCCAACAGCTCAGGGAGCTTTATGAGACA  
CTTTAGCCGGAGAGTCAACGTGAGAAGCAAGAGCATGACCCGATTGTCACCGGATTTGACGG  
AGACAGAATGGTTTTATCTAATGTGCGTCTCTTTCTTTTTCTCTCCATCTGGGATGCCAGGAAAAAG  
CGTATGCAAGGAGGAAGCACGTATGGCTAAGTGGTGCAATGAAGTTGACAGTAAAACCTTTTTCTAG  
AGCTATCTCGCTAAGAGTGCTAAAATTCAGACAGTGGTTTGCATTCCAATGCTTGATGGTGTGTGG  
AACTAGGCACAACGAAAAAGGTAAGAGAAGATGTAGAGTTTGTGAGCTCACAAGAGTTTCTTCTA  
TGACCAGTCAAGACGAAACCCAAAGCCGGCTCTTTCTGAACACTCCACCTTCTTACATCCAATCATCGTT  
GCCGAAGACGAAGAAGAAGTAGAAGAAGAGATGACAAATGTCAGAGGAAATGAGGCTTGGCTCTCT  
GATGATGAAGATGTTTCCAATCAAAAATCTACACTCTGATCTTCATATTGAATCAACCCATACGTTAGA  
CACACATATGGACATGATGAATCTAATGGAGGAAGTGGAAACTATTCTCAGACAGTAACAACACTT  
CTCATGTCAACCCCAAGTCTTCTTTCAGATTCAGTTTCCACATCTTCTTACATCCAATCATCGTTT  
GCCACGTGGAGGGTTGAGAATGGCAAAGAGCATCAGCAAGTGAACCGGCGCTCACAATGG  
GTGCTCAAACAAATGATCTTACAGAGTCCCTTCTCTCCATGACAACACTAAAGATAAGAGGGTACC  
GGAAAGATCTGAGCCACGTAGTAGCAGAGCGCAGGAGGGGAGAAGCTGAACGAGAAATTCATAAC  
GTTGAGATCAATGGTTCCATTTGTGACCAAGATGGATAAAGTCTCAATCTTGAAGATCAGGATGAA  
ACGTAAATCATCTTCGAAAGAGGGTCCATGAGCTTGAGAATACTCATCATGAGCAACAGCATAAGCG  
GACGCGTACTTGTAAAGAGAAAAACATCGGAGGAGGTGGAGGTTCCATCATAGAGAATGATGTTTTG  
TTAGAGATGAGATGTGAGTACCGAGATGGTTTTGTTGCTTGACATTCTTACAGTTCTTATGAGCTTGGT  
ATAGAGACTACGGCAGTTCATACCTCGGTGAACGACCATGATTTTCAGGCGGAGATAAGGCGAAAG  
TAAGAGGGAAGAAGCAAGCATCGTGTAGGTCAAAGAGCCATCCACCAAGTATAATACATGATA  
CTAATCTATAG

*AaGL3*

ATGGCTTCCGGACAAAACAGAGCATCTGTACCGGAGAATCTAAAGAAAACAGCTTGCAGTTTCAGTTC  
GAAGTATTCAATGGAGTTATGCAATTTTTTGGTCTGTTCTGCTTCTCAATCAGGGGTATTAGAGTGGG  
GAGATGGATACTATAATGGAGATATCAAAACGAGGAAGACGATTCAAGCTTCGGAGATCAAAGTCTA  
TCAGCTTGGTTTACGGAGGAGTGAGCAACTTAGAGACTTTACGAGTCTCAACATCGCTGAATCTT  
CTTCTCCGGTTCTCAGGTCACTAGACGAGCTTCCGCCGCCGACTATCGCTGAAGATCTCGCCGAC  
ACCGAGTGGTATTACTTGGTTGTATGTCTTTCGTTTCAACATTGGTGAAGGAATGCCTGGACGAAC  
GTTTACGAATGGTGAACCGATATGGTTGTAAACGCTCATACCGCGGATAGTAAAGTCTTTAGCCGCT  
CTCTTTGGCAAAAAGTGTGCTGCGTTAAGACAGTGAATTTGTTTCCCGTTTCTTGGAGGAGTCTGTTGAG  
ATCGGTACTACAGAACATATTCAAGAAGACATGAACCTTATACAATGCGTGAAGACATCATTCTAG  
AAGCTCCTGATCCATACGCTACAATATTACCAACAAGATCCGACTATCACAATGATCTCGATCCGCAA  
CAGATTCTAGGCGATGAGATTACGCTCTATGTTCCGTAAGTACTGAGCTTTTCCAACACTTCTCTAGC  
AGAACTCAAAATGGTTTCGATACCGGAACCAACAAGTAGCCGAAGATTCTCATGGTGTATGGAA  
TGAATGGAGGAGCTTCTCAAGTGCAAAAGTTGGCAGCTTATGGACGACGAGCTTAGTAATTGCGTTT  
CAATCGCTAAATTCAGCGATTGCGTCTTCAAACGTTTGTGAAGCAGCGGGTGGCCGAGTTTCTTG  
CGGTGCAAGAAAAGGTAGGGCTCAAAGATTAGGGCAAATTCAGAGCAACAGAGAAAACGTGAAGAT  
GTTGTCTTTGATCCAAGAAAACGATGATGTTTACCAAGGTGTTATCTCCACGATTTTTAAGACCAA  
CTTACGTTAATCTTGGACCGCAATTTTCGAAACTGCGATAAGCAGTCAAGCTTCAAGAAGTGAAG  
AAATCATCAACCTCATCATCAGGAACCGCGTGGTTGCACCATCATCACAAGAAATGATAAAGA  
AGATTCTTTTCGATGTTCGCGAGCTCATCTAAAAGAGAAAATGTTGTTGGATTACCAGAGCTCGGG  
GATGAAACCGCAACACCGGGTTAGATAAAGAAAACGGCTGAGAAAATGAACGAACGGTTTCTG  
ACCTTAGATCTATCTTCTTCAATCAATAAGATCGACAAGTATCGATTCTTCAAGAATGATAAGA  
GTATCTTCAAGAACTCGAAAGACGGTTCAAGAACTAGAATCTTGCAGAGAATCAACCGATACAGAA  
ACTCGCGGACAATGGCAATGAAGAGGAAGAAAACAGCACGATGAGGAGAAAAGACGTGAGCTAAT  
TGCACAAAATGAACCGGATAATGGGAAGAAAAGTTCCGGTTGGAGAAGCCGAACAGCTGAAACC  
GGTTACTTGGTCTAACCGATAATTTAAGGATCGGTTTGGTAACGAGGTGGTTATTGAGCTTAG

---

ATGTGCTTGGAGAGAAGGAGTATTACTTGAGATAATGGATGTGATTAGTGATCTCAACTTGGATTCTC  
ATTCAGTACAATCATCGACCGGAGACGGTTTACTCTGCTTAACCGTCAATTGCAAGCATAAAGGATCA  
AAAATAGCTACACAAGGAATGATCAAAGAGGCACTTCAAAGGGTTGCATGGATCTGTTGA

---

*AaEGL3*

ATGGCTGCCGGAGAAAAACAGAACGGTACCACCAGAGAATCTAAAGAAAACAACTCGCAGTTTCAGTTC  
GAAATATTCATGGAGTTATGGAATCTTTTGGTCTGTCTCTACTTCTCAACCAGGAATGTTGGAGTGG  
GGAGATGGATACTACAATGGAGACATTAAGACAAGGAAGACGATTCAAGCAGCTGAAGTAAAGTTC  
GACAAGTTAGGTCTTGAGAGAAGTGAACAGCTTAGAGAGCTTTATGAATCTCTCTCCATCGTGAATC  
TTCAACTTCCGGTGGCTCTCAGGTCAGTAGACGAGTTTCCGCCGCCGCTCTATCCCCGGAGGACCTCA  
CCGACACTGAGTGGTATTACTTAGTCTGCATGTCATTTCATCTTCAACATTGGTGAAGGAATCCCCGGA  
GGAGTGGTGGCAAACGGAGAACCAATATGGCTTTGTAACGCTCAAACCGTGTATAGCAAAGTCTTCA  
CTCGCTCTCTTCTCGCTAAAAGTGGCTTCGCTTCAGACAGTTGTTTGGCTTCCCATTCTTGGAGGAGTCC  
TTGAGATCGGCACTACCGAACATATTAAGAGGACTTAAACGTGATACAATGCATAAAGACATTGTT  
TCTTGAAGCTCCACCTTATCTACAATATCATCAAGATCCGATTATCAAGAAATCTTCGATCCATTAA  
CGCAGATAAATACATTCCCGTGTGGATCTGAACCTTTCCGACACTCCACGAGCGGGTTTGAG  
CAAGAACAAGAGGATCATGATTCTGTTTATCAATGGTGGTGGTGCCTCAGGTCCAAAGCTGGCAGTT  
TGTTGGTGAAGAACTCAGTAATTGCGTTCATCAATCGCTTAAATTCTAGCGACCGGTTTCCGACAGCGC  
TTGTTGGGAGAGTAGCTTGCATCCAAGAATAAGTAGGGTTCAAAAATTAGGTCAGACACAAGAACA  
GTGTAACCGTGTAAATATGGATGATGATGATCATTACCAAAGCGTGTATCTCGACGATTTTTAAACGA  
CGCATCAGCTTATTCTTGGACCGAGTTTCAGAATTCGATAAGCGGTCAAGTTTTACGCGGTGGAAA  
CGCTCATCATTTGCAAGAACAATGGGAGAGAAAACCGCAGAATATGTTAAAGAAGATTATTTTTGAGG  
TTCTCTGATGAACAAAAGAAGTTGTTGTTACTTGACACACCCGAAGATAGCGGGATTAAGGTCGG  
GGATGAAACGGCGAACCATGCCTTGTCTGAGAAGAAACGTCGTGAGAAATTGAATGATCGGTTTCATG  
ACTTTGAGATCTATCTTCTTCCGACTAGTAAGATTGATAAAGTGTGATCTTTGATGATACAATTGA  
GTATCTTCAAGAAGTCAAAGACGGGTTCAAGAATTGGAATCTTGCAAAAGAACTACTCATATAGAG  
ACGCGAATGACGACAATGAAGAGGAAGAAAACAGAGGATGAAGATGAAAGAGCCTCAGCTAATTTG  
ATGAACAAGAGGAAGGAGAGTGTGATGTGATGATGAGACAAGATGAACCGGTGATACCGGTTTTGCTG  
GTTAAACCGATAATTTAAGGATTGGTTCTGTTGTTGTAATGAGGTGGTTATTAGCTTAGATTCTTGG  
AGAGAAGGGATATTGCTTGAGATCATGGATGTTATAAGTAACCTCAACTTGGATTCTACTCGGTACA  
GTCCTCAACCGGGGACGGTTACTATGCTTAAACCGTCAATTGCAAGCATAAAGGGACAAAAGTAGCT  
ACAACAGGAATGATCCAAGAGGCACTTCAAAGAGTTGCATGGATATGTTAA

*AaMYC1*

ATGTCTTTGACAATGGATGATAGTGTAGAAGTAGGAAGAGGAGGAAGAAGTAAAGCACAAAAACAGC  
TTATTAAGAAAAACAACTTGCTTTAGCTGTAAAGAGTGTTCATGGAGCTATGCAATCTTCTGGCTTCT  
TCACCAACTCAATCCGGGGTTTTGGAGTGGGGTGAAGGATCTTATAATGGAGACATAAAGAAGAGGA  
AGAAGATATATGAAGCTCATTGTAAATATGGATTGCAAAAGAAGCAAGCAACTTAGGAAACTTTATCT  
GTGTATGCTTGAAGGAGATACTAGTAGTACTACTCATCATGATGATTATGATGATGGTGTATGATGATG  
GTGGTCGTAATAGTACAACATGATGCTTTCACCAGATGATCTCTCTGATGAAGAGTGGTACTATTTA  
GTCTCCATGTCTATGTCTTCTCTCTTCTCAATGTTTGCAGGAAGAGCTTTGGCAACTGGTGTAGACC  
ATATGGCTATGCAACGCTCAGTACGCGGAGACCAAACCTTTTTCTCGTCTTGTAGCAAGAAGTGC  
ATCAATCCAGACCGTGTGTGTTTCCCTTATTTGGGTGGTGTGATTGAGCTAGGCGTCACAGAATTGA  
TATCAGAAGATCCTAATGTGCTTCAACACATCAAATCTTGTCTGTTGGAGACTCGAAAACCGATTGC  
TCTTTAAACCACTTCTGTTCACCAAGACAACGATGAAGAGAAGAATCAAATGAGGATTAAGACTA  
GTGAAGGAAACTCAATGCTCGAAGAGAACCATGAGATTCTATTAGGTCTATCTGATGAAGACTTGC  
TTACAAAAGAACCATCACAACGGTACTCAAACGCTGCGAATAGATCGAGAAGGAACGCAAAAAA  
CATTCTCATCGTGCCTAATGTTGATTCTGGCTCAAGTTTCTCCGGTGGAGACATGACGAGC  
CAAAGTCAAATGTGTTGCGAGCCACTTACAGAATGTGTTGCGGAAAATACTTCTATGATGTCCCTTG  
ATGCACTCTACAGACACAAAGAGAATGTTCCCAAGTCAAAGATTTGGTCTGAATCAAGATGATCCTA  
ATTCGGACAGAAGAAGAGAGAACGAAAAGTTCAAGTGTCTTAGAACAATGGTTCTACTGTCAACGA  
GTTTGTAAAAGAAATCGATATTGAACAATAAATCAAGTACTTGAAGAAGCTTGAAGGCAAGAGTAGAG  
GAGCTAGAATCTTGTATGGGATCAGTTAATTCTACTGAAAAGACAAAAAATGACTACGAAGAACCTTA  
ACGACTCTGTGTTGATCGAAGAGACATCAGGGAACATGATGACAGTACAAAAGATCGATGGGAACCTC  
AGGAGAAACCGAACAAAGTCTTTAGAGACCAGACACATTGAGTGTCAAACCTGAAAGAAACAGAAGTT  
TGATCGAAGTAAGATGTTCTTACAGAGACTATAGTTGCAGACATCATGGAAACTCTGAGTAATCT  
CTCATGGATGCTTTCTCTGTTAGATCTCACACACTTAAATGGGTTTCTCATGTTTCAAGGCCAA  
GTTCCGCGGGGCTGCAGTTGCGTCAAGGATGATCAAGCGAGAGCTGAGAAGAGTTATTGACTTT  
CTTGAATCTATATGGGATGTTTCACTTCTGATCAAGTTTTCCGAGTGTGTTGATGTTAA

*AaTT8*

ATGGATGAATCAAGTACGATTCCGGCAGAGAAAACCTGGTCTCGGAGTTGAAAGAAGGGAGTTGCAAG  
AGCTGCTTAAAGCGCGCGGTGCAATCTGTAGAGTGGACTTATAGTCTTCTGGCAATTATGTCCTCAA  
CAAAGGGTTTTAGTATGGGGGAATGGATACTACAACGGTGAATAAAGACAAGGAAGACAACCTCAG  
CCAAAGGAAGTGACAACGGAAGAGGCTGCTTAGAGAGGAGTCAACAGATCAGGGAGCTTACGAA  
ACACTTTTGGCCGGAGAGTCACTACTGAAGCGAGAGCATGCACCGCATTGTGCGCCGGAAGATTTAA  
CGGAGACTGAATGGTTTTATCTAATGTGTGCTCTTACTTTCTCTCTCCTCAGGGATGCCGGGAA  
AAGCGTATGCGAGGAGTAAACACGTATGGCTAAGTGGTGCAAAATGATGCTGACAGTAAAATCTTTTC  
CAGGCTATTCTTGCTAAGAGTGCAAAATTCAGACCGTGGTTGTTATTCCATGTTGATGGCGTCTG  
TGGAACCTGGTACAACGGCCAAGGTAAGAAAGATTAGAGTTTGTGAGCTCATAAAAAAGTTTCTTC  
CATGACCACCAAGTCAAACCAAAGCCTGTTCTTCTGAACACTCCACATACGAATTAGAGCACGA  
AGATGAAGACGAAGAAGAAGAGTAGAAGCAGAGGTAGAATGACAATGTCAGAGGAAGTAAGGC  
TTGGTCTCTGATGATGACGAAGCCTTATTCAAATCTACGCTCTGATTTACATATAGAATCAACCC  
TTCGTTAGATATAGACACACATGACATGATGAATCTAGTGGAGGAAGGTTGGAACACTTATTTCA  
GACAGTATCAACACTTCTTGTCAACAACAGAGTCTTCTTTCAGATTGAGTTTCCACATCTTCTCA  
CATCCAATCATCGTTTACCACGTGGAGGATTGAGGCTTTGAAAGAGCATGACCATCAGCGAATGGAC  
AATGTGTCATCGTCTCTCGTGCACCGGATGCTCAAATACATTCTTGGAGGCTCCTTCCCTCCAC  
GAAGCACTAAAAGTACATAAGACACTACCGCGAGAAGAGATTAAACCACTGTTGTTGAGCAGCGACGC  
AGAAGAGAGAAGTTAAACGAGAGATTCAACATTGAGATCAATTGTTCCATTTGTGACCAAGATGG  
ATAAAGTCTCAATCCTTGGAGATACCATCGATTACTTAAACCATCTTCGAAAGAGGATTGTTGAGCTT

---

---

GAGACTACTAACACGAGCAACAACATAAGCGGATGCGTACTTGTAAGGGAAAAACATCGGAAGAA  
GTGGAGGTTTCCATCATAGAAAGAGATGTTTTGTTAGAGATGAGATGTGAGTATCGAGATGGTGTATT  
GCTCGAAATTTCCAGGTTCTTAAGGGCCTCGGTATAGAGACTACCACAGTTCATACCGCGGTGAAGG  
ACAATGATTTGAGGCCGAGATAAGGGCTAAGGTGAGAGGGAAGAAAGCAAGTATCGCTGAGGTCA  
AAAGAGCTATCCATCAAATCATATCCAATACTATACTATAG

---

**GhDEL61**

ATGGCTACTACTGGGGTTCAAATCAAGAGAAGGTCCCAATGAACTTGAAGCAACAACCTTGCTCTTG  
CTGTTAGAAAACATTCAATGGAGCTATGGGATTTTCTGGTCCATTTAGCTAAAACAACCAGGGGTCTTG  
GAATGGGGTGATGGTTATTACATGGAGATATAAAGACAAGGAAAACAGTTCAATCTTTTGAACCTA  
AAGCTGATGACCAACTAGGTTTACAAAAGAAGTGAGCAATTAAGAGAAGTATTTGAATCACTTTCAGC  
TGTTGAAAAGTGTCTCATACTAAAAGACCTTCAGTTGCATTATCCCCTGAAGATCTCACTGCTACTG  
AATGGTATTATTTGGTCTGTATGTCATTTGTATTCAAACATTGACCAAGGATTGCCTGGAAGAACATTAT  
CAATTGGTCAACCTATTTGGCTATGTAATGCTCAATATGCAGATAGTAAAGTGTAGTCTGTTCACTG  
GTTGCTAAGAGCGCGTCTATTCAGACAGTAGTATGCTTTCCATATGCAGGAGGTTGTGATTGAGCTGG  
TGTACTGATTTGGTATCGAAAAGACCCCGTCTTATTTCATCGTGTAAAAGTGTGTTGTTGGATGCTCC  
GGAGACATAACAGGGAACATCAATGATGTTGGTCTTCCAGGTCCTGGTCCGAACAAAATTTGAGTCC  
GAATTGAGTCCGTTTTAGGCTGTGAACAAGTAAAGAGGTTCTCAAACGAGATTTCCGGATGGTTTT  
TGAGCCTAACCAACCAGCAGAAGATCCGTTCCGTGAATGGTGGGGCTTCTCAGGTGCAAAGTTGGCAA  
TTCATGGATGACCACCATTCTTTGAATACAAGTGACTGCATATCTCAAACCTTTTCTGATCATGAAGAT  
GTTGTTCCCTGTGCGCAGGGTGAATAATGATAATGACAATGATTCCGAGATGTCGAAGAGTGTGATCG  
TATAAACCGGGCTGCTTTTGTATCCTATAAGCGATGATATGCACTACCGAACCCGTCGTGTCGGTCTAT  
TAAAGAGCTCGCACCAGTTTTATTCTGGGACCGCATTTTGGAAAACCTCGAACAAAGGAATCCGGGTTCAAT  
AGCTGGAAGATGAATAGCTCAGTGAATATCGGAAAGCAAAGGTTGAAATCCCTCAAAAAGTTATTGA  
AGAAGATGTTGTTGAAGTCCCTCGGATGATGATAAAGGATTGCTTAAATGTCGAAGAGGCGGTGAT  
GGTGTGGAGATGCGGTTTGGAGACCAGAAGCGGATGAACCTTTGTAAGCCACGCTTTATCAGAGA  
GGAGGCGTCGGAAAAATAAACGAACGACTTATGATCCCAAATCATTGGTCCCTACGAATAGCAA  
GGCTGATAAAGTTTCTATCTTAGATGATAACAATAGAGTACCTACAAGACCTCGAAAGAAGAGTTGAA  
AAATGGAATGTTGCAGAGAATTAACCGAGTCTGAGACTAAAACGAAACAGAAACATCATCGGGATC  
GTGCTGAGCGAACATCCAGTAACAAAAGTACCAACGGAACAAAACCGGCTTCTCAAATAAAAAGGAA  
AGCGTACGATATTGAGGAAACAAAACAGGATATCGACCATGTTGCATCTAAAGACGGCTCGACCGAA  
AATCTAACCGTTAGTACGAACAACAAGGATTTAAACATCGAGTTAAGTGTGATGGCGGGATGGAA  
TTCTGTTCCGAGATAATGGATGCTCTAAGCGTACTTGATTGGATTGCCACTCTGTTCAATCGTCTACCA  
TTCGAAGGATTTCTTTCTGTGACTATAAAAATCAAAGTACAAAGGATCAAGTGTGCAAAAACAGGGAC  
AATCAAGCAAGCATTATTACAAAAGGTTCAATCTTTAACCTTTGTGTA

**GhDEL65**

ATGTCTACTGGAGTTCAACATCAAGAGAGAGTACCAATGAACCTGAAGAAACAACCTTGCTCTTGCTGT  
GAGGAACATTCAATGGAGTTATGCAATTTTCTGGTCCATATCAACTAGACAACCAGGGGTGTTAGAAT  
GGGGAGAAGGTTATTACAATGGAGATATAAAGACAAGGAAAACAGTTCAATCTGTAGAACTCAACAC  
TGACCAATGAGTTTACAGAGAAGTGAGCAACTGAGACAGCTTTATGAGTCTTTTCAGCTGGTGAAA  
GCAGTCCCTAAAGCTAAACGACCTTCAGCAGCATTATCTCCTGAAGATCTTACTAGTATCAATGATG  
TACTTGGTTTGTATGTCATTTGTATTCAACATTGGCCAAGGATTACCTGGAAGAACATTGTCTAGTGGT  
CAACCTGTTTGGCTTTGTAATGCTCATTGTGCTGACAGTAAAGTGTGGTTCGTTCACTACTAGCTAAG  
AGTGCATCGATTGACTGAGTATGCTTTCCGTTTTAGGAGGTTGGTGGTGGTGGTGGTGGTGGTGGTGGT  
TTTGGTATTTGAAGATTTGAGCTCATTGAGCGGTTAAAACCTTTGCTTGGATGATCCACAGCCGAT  
TGTTTCTAAGAGATCGATTCAAGTGCATGGGATGAACAACGATCTTGCTTGTCCAGCTCTTGATCCTTT  
GATCCTTGCCACCAAAATGAGTCCAATATTAGGCTGTGAACAACCTAGAAAACGGTTTTCTCCTGATGATA  
GTCCGGACGGCTTGGAGCCTAAGCAATCAAGAGAAGATTCATTATTGATTGAAGGGATAAATGGTGG  
AGTTCTCAAAGTACAAAGTTGGCAATTCATGGATGAAGAGTTCAGCAATTGTGTTCAACATTCCTTGA  
ATTCAAGTACTGATATCTCAAACCTTGGGATCATCGAAAGGTCGTTCTCTTTGCGGGGGAGAA  
AATGATAATGTTTGAAGATGTTGAAGAGTGAATCAGACTAAACTAACATCTTTGATCGTCAAAA  
CGATGATCGGCACCTTCCATGAAGTCTCTCGGCCCTTATTCAAGAGCTCACACCCGTTGATTTAGGAC  
CACAGTTTCGAAACTTAAACAAGGAATCGAGCTTATCAGATGGCAGAAAAATGGCTTGAAGCCTCA  
AAAAGAAAGAGATGAAACCCCTCAAAAAGTACTGAAGAAGATATTGTTCTTGGTTCCTCATATGCAT  
GATAGAGGATTGATTGAATCTCTGAAACTAATGCTGTTCCGAGATGCAGCTTGGAGACCCGAAGCTG  
ATGAAATTTGCGGAAACCATGTTTATCGGAGAGGAAGCGGAGGGAAAAAATAAACGAACGACTTA  
TGATGTTGAAATCACTTGTCCCTGCAAATAACAAGGCTGACAAGGTTTCTATACTAGATGTCACGATA  
GAATACTTACAAACCTCGAAAAGAAAGGTTGCGGAATTGGAATCTTGCAAGAAAGTCAAGCAAGAA  
CGAAAATCGAGCGAACATCAGATAACAACGAAAGAAATCGTCCCTAAGTAAAAGGAAAGCCTATG  
ATGTTGTTGATGAAGCTGATCAAGAGATCGGCTATGTTGCATCTAAAGACGGTTCAACAGATAAAGTT  
ACTCTCAGTATGAACAACAAGGAGCTTCTAATCGAGTTCAAGTGTCCATGGCGAGAAGGAATTTGCT  
TGAGGTAATGGATGCATTAAGCATTCTCAATTTGGATTGCCACTCAGTTCATCTACCCTGAGG  
GGATTCTCTCCCTGACCATAAAAATCAAAGTACAAAGGATCAAGTGTGCAAAAAGCAGGACCAATCGA  
GCAAGCATTGCAAGAATTGCTAGCAAGTGTGA

---

*PhANI*

ATGCAGCTGCAAACCATGTTACGGAACGCTGTGCAATCTGTTTCAGTGGACATATAGTCTTTTTCTGGCA  
ATTATGTCTCAACAAGGGGTGTTAGTGTGGAGAGATGGATATTACAATGGAGCTATAAAGACTAGG  
AAAACAGTGCACCAATGGAAGTTAGTGTGAGGAGGGCTTCTCTTACAGAAAGCCAGCAACTTATAG  
AACTTTGAATCACTTTCTGCCGCGAATCAAATCAACCGACGAGAAGGCCATCAGCAGCTTTATCA  
CCGGAGGACTTGACTGAATCAGAGTGGTTTTATCTCATGTGTGTTTTCTTCTTTCTGTTGGAATC  
GGATTACCAGGCAAGGCTTATTCAAAGAAACATCACATATGGATAACTGGTGCAAACGAGGTTGAAA  
GCAAAGTCTTTGTAGAGCTATTCTTGCTAAGAGTGCCTGCGTACAGACTGTCTGTATTCTCTAT  
TGGATGGTGTAGTGGAACTGGGGACTACACAACGGATTCAAGAAGACATTTGGATTATAAACCATGT  
CAAGACTTTCTTATTGAGCAACAACCACCTCTGCCGCAAAGCCAGCCTTATCTGAGCACTCCACTC  
CCAATCCCACCACATTTTCAGAACTAACTTTTACTCCAGCAATACTCCACCATCCGCTGGCACTACTC  
CTGCGGATGAACACGGTGGAGTAGCCGGAGATGAAGACGAAGAAGTAGAGGATGAGGAGGACGAAG  
ACGAGGAACAAGAGGATGATGAAGAAGCCGAGTTGGACTCGGATAAGATAGCGGCTCAGGTTGGCC  
CGGCTGATGTTATAGCCGCGGCTGAGGCCAGTGAACCTTATGCAGCTTGATATGCTGAGGCAATACCG  
TTTGGGTCACCGGATGACGGCTCCAATACAAATATGGACTCTGATTTCCATATGGTTGGAGTTAGCCA  
AGCCGAAAACCCAGCTGACTACCAGCGCAAGCTGAGTCAATCAAGCTGACACTTCCATTAGCTGG  
GCTCATTTTCCAAGACCTTCCACATTTACCAGGCGGCCCTAGTTATGATGAATTATCACAAGAAGACAC  
ACATTACTCAAACAGTGTGACCACTTCTTGAACACCTCTCAAACCAAAGCTCCAAATTTTCTCTAC  
CATAATGGGCTGTATTTCCAAACAACCCAATCTGCCTTACAAGGTGGCCAGCCACGACCACCG  
TCTCCAGCCATTTCTTGACGGCGGCCACCTCCGGCCAGTGGCTGCTCAAAAGCATACTATTCTCT  
GTTCCATTTCTTCACTAAATACCAAACCTGCAGCTGAAGTTTCTCAAAGTCACTGACGCTACCAC  
TGTTGATTTCTCCACTGCATCTCGCTTTCGAAAAGGGTGTAGTATAACACAAGAAGACGCTAGTGGAA  
ACCATGACTTGTGAACGACGGCGTAGAGAAAAGCTCAACGAACGGTTTACTATTTGAGGTCACCT  
GTTCTTTTGTACGAAAATGGATAAAGCCTCCATTCTTGGTGACACCATAGAATATGTCAAGCAGTT  
ACGTAAGAAAAGTTACAGGATCTTGAAGCTAGAGCCAATCAGACGGAGGCTACGCTGCAGACAAAAGGAT  
ACAGGTAAGGTTGCAAGGTAAGGGAAGGGTAAAGGAGAATGAAGATAGTGAAGGAAGTGT  
GGTGGAGGACGCAAAAGATCAGCGCATCCCTCGCCCTCAACGACACATGAAGAGATAGTGCACAA  
GTAGAAGTATCAATTATCGAGAGTGTGACTGGTGGAGCTCAGGTGTCCATACAAAGAAGGGTTGT  
TGTTAGATGTAATGCAATGCTAAGGGAACCTAAAGTGGAGGTTGTAACCATCAATCATCTTAAAT  
AATGGCAGCTTCTTTGCTGAGCTGAGAGCTAAGGTAAGGAGAATATATATGGAAGGAAAGCAAGCA  
TTCTGGAAGTCAAGAAGTCAATACACCAGTTAATCCCTAGAGTTAA

*PhJAF13*

ATGGCTATGGGATGCAAAGACCATAATGGAGTCCCTGACAACCTTGAGAAAACAACCTTGCTTTGCTGT  
TAGAGGCATTCAATGGAGTTATGCAATTTCTGGTCAACTACAGTTTCACAAACCAGGGGAGTTGGAAT  
GGAGTGTGGTTACTATAATGGAGATATTAAGACCAGGAAGACAGTTTCAGGACGGGGAAGTGCATGA  
AGACCAGCTGGGATTGCAAAGAAGTGAAGCTGAGAGTGAAGAGAACTTTATAGTTCCCTTAAATAGGTGAA  
GGTGAGGAAGACCTCCAACCACAGGCTAAAAGGCCCTCGGCTGCATTATCTCTGAAGATCTCACTG  
ATACAGAGTGGTATTTCTTAGTATGCATGTCTGCTTCAATGTTGGCCAAGGGTTGCCAGGAAAAG  
AGCTTAGCAAGGAACGAAACAATCTGGCTATGTAATGTCTACCAAGCAGAGAGTAGAGTATTTTCTC  
GGTCTCTTCTAGCAAAGAGTGCATCTATCCAGACTGTTGTATGCTTTCCGTATCCTTGAGGAGAAATTG  
AGCTGGGAGTCACTGAGCTTGTGTAGAAGATCCCAACCTCATTACAGCAAATAAAAAATTTCAATACTA  
AAGGTTGATCACTCCATTATCCGAAGAGGCCTAATTATGTCTCTAGTGTGCAAAAAATGACGCCAT  
TGGCCTTTGCCAAAGCCTGATCATAATGTTCTTGAATAATGATGCTTATCCAGTTGAAATAAACAATA  
GTTCACTCATGATAGTTCAAATGGTTTGGTGCAACTCAGGAGGTAGAAGATTCACTAATGGTGGTA  
GGTGTATAGGTGAAAACCTTCAAAAGCTCAAAGCTGGAAAATCACGGATGATAATATGAGTAAACGGTG  
TGCATAATCTTTGAATCCAGTACTGACTCTCAAAATATGCAAAATGTGAAAAGTTGTCCCTC  
TTTCTAGTGGAGAAAAGAAAACAAGCCTGCCCACTAGACCATCAAGAGCACAATCAGAGGAAGCT  
ACCTTGTGGATCACCAGGAGATGAAACTCAGTATCAATCTGCTTCCCTTAACTTGAAGAAAGT  
CTGACCAATTAACCTTTGGGACCATATTTTAGAAAATACTAATAAAAAGGTCAATGTTTTTCTGGTTGAAA  
AACGATGCTCATATTTCCAAGTAGAGGAAGTCTCAAAACTATTGAAGAAGTACTTGTGAAGTTCC  
TAGAATGCATGGTAGTGTATACATAAATCAGCAGAGAGAATCGTAAAAGGAACGGTCTTTGGAGA  
CCAGAGGTTGATGACTGATAGAAGCCGTGTTATTTCTGAGAGAAGGCGAAGAGAAAAGATAAATG  
AGAGTTTATGCTTCTTGCATCAATGCTTCCAGTGGTGGCAAGGTTGCAAAAATCACTCTTTGAT  
GAGACAATAGAATACCTGAAAGAGCTTGAAGGAGAGTTCAGATCTTGGGCTAAATCAGGAAGA  
AGACCAATGACGTAGCAGAGCAGACATCTGATAATTGTGGCACTAGTAAATCAATGACATCGAGG  
AATCACTACCGAACAAGAGGAAGGCATGTGAAATGGATGAACTGGAACCTGAAAGTCGTAATGGATT  
AATGAAAGGTAGTTCACTGATAGTATTGTCTCAATATGATGATAAGGAAGTTCAATCAAGATG  
AGGTGTCTTTGAGTGAAGGCTTGTGTTAAGATTATGGAAGCACTGACCGCCCTACAGATGGATTG  
CCATACAGTTCAATCTTCCAACATTGATGGGATTCTATCCATTTCTATTGAATCTAAGTCAAAATGTATC  
GAAAACCTGTATCAGTTGGAACGATTAGAGAAGCACTTCAGCGAGTAGTCTGGAAATCT

*ZmR(Lc)*

ATGGCGCTTTCAGCTTCCCGAGTTACAGCAGCGGAAGAAGTCTGCAACGACCTGCTGAGAGGCAGC  
TGATGAGGAGCCAGCTTGTGACGCGCCAGGAGCATCAACTGGAGCTACGCCCTTCTTGGTCCATT  
TCAGACACTCAACCAAGGGTGTGACGTGGACGGACGGTTCTACAACGGCAGGTGAAGACGCGG  
AAGATCTCCAACCTCCGTGGAGCTGACATCCGACCAGCTCGTCTATGCAGAGGAGCGACCAGCTCCGGG  
AGCTCTACGAGGCCCTCTGTGCGGGCAGGGCGACCGCCGCGCTGCGCTGCGCGGCCGCGGCTC  
TCTGTGCGCGGAGGACCTCGGCGACACCGAGTGGTACTACGTGGTCTCCATGACCTACGCCCTCCGGC  
CAGGCCAAGGGTTGCCCGCAGGAGTTTCCGAGCAGCAGCATGTCTGGCTGTGCAACCGCACCT  
CGCCGGCAGCAAAGCCTTCCCCGCGCGCTCTGGCCAAGAGCGCGTCCATTCACTAATCTCTGCA  
TCCCGGTTATGGGCGGCGTGTGAGCTTGGTACAACCTGACACGGTGCCGGAGGCCCGACTTGGTC  
AGCCGAGCAACCGCGGCTTCTGGGAGCCGAGTGCAGGCTCCAGCCGTCAGGACGAGCAAACG  
AGACCGGCGAGGCCGACGACAGCAGCGCACGTTTGGCTTCGAGGAACCTGACCACAATAATGGCAT  
GGACACATAGAGGCGATGACCGCCGCGGGGACACGGGACAGGAGGAGCTAAGATAAGAGA  
AGCCGAGGCCCTGTGACAGCAGCAAGCCTGGAGCACATCAACGAAGGATCGAGGAGTTCTACAGC  
CTCTGCGACGAAATGGACCTGACGGCGCTACCACTACCGCTAGAGGACGGCTGGACCGTGGACGCT  
CCAATTTGAGGTTCCCTGCTCTTCCCCGACGCGCCGCTCCGGTGGACAGGGTACCCTAAC  
CTCGCCCGCAGCCTCAAGGCAACCGCTACGGCTCTCGCGCAGCAGGTTTCAATGCTGGACTGGAGG  
GTCCTCGCAGCAGTCTGTGCTCCGACGACGCGCGCCCGCAGCAGTAGTGCCGGCCATCGAGGAG

---

CCGCAGAGATTGCTGAAGAAAGTGGTGGCCGGCGGGTGTCTGGGAGAGCTGTGGCGGCGCAGC  
GGAGCAGCACAGGAAATGAGTGGCACTGGCACCACCAAGAACCACGTCATGTCCGAGCGAAAAGCGACGA  
GAGAAGCTCAACGAGATGTTCTCGTCTCAAGTCACTGCTTCCGTCCATTACAGGGTGAACAAAAGC  
GTGCATCTCGCCGAAACGATAGTCTACCTCAAGGAGCTTCAGAGAAGGGTGAAGAGCTGGAGTCC  
AGTAGGGAACCTGCGTCCGCGCCATCCGAAACGACGACAAGGCTAATAACAAGGCCCTCCCGTGGCA  
ATAATGAGAGTGTGAGGAAGGAGGTCTGCGCGGGTCCAAGAGGAAGAGCCAGAGCTCGGCAGAG  
ACGACGTGGAGCGCCCCCGTCTCACCATGGACGCCGGCACCAGCAACGTCACCGTACCGTCTC  
GGACAAGGACGTGCTCCTGGAGGTGCAAGTGCAGGCGGGAGGAGCTCCTGATGACCGGAGTGTTCGAC  
GCCATCAAGAGCTCCATTTGGACGTCTCTCGGTTCCAGGCTTCAGCGCCAGATGGCTTCATGGGGCT  
TAAGATACGAGCTCAGTTTGTGGTCCGGTCCGCTCGTGCCTGGATGATCAGCGAGGCTCTTCGCA  
AAGCTATAGGGAAGCGGTGA

---

**ZmR(S)**

ATGGCGCTTTCAGCTTCCCGAGTTCAGCAGGCGGAAGAACTGCTGCAACGACCTGCTGAGAGGCAGC  
TGATGAGGAGCCAGCTTGCTGCAGCCGCCAGGAGCATCAACTGGAGCTACGCCCTCTTCTGGTCCATT  
TCAGACACTCAACCAGGGGTGCTGACGTGGACGGACGGGTCTACAACGGCGAGGTGAAGACGCGG  
AAGATCTCAACTCCGTGGAGCTGACATCCGACCAGCTCGTCAATGACAGAGGAGCGACCAGCTCCGGG  
AGCTCTACGAGGCCCTCCTGTGCGGGCAGGGCGACCCGCCGCGTGCCTGCGCGGGCCGCGGGCTC  
TCTGTCCGCGGAGGACCTCGGCGACACCGAGTGGTACTACGTGGTCTCCATGACCTACGCCTTCCGGC  
CAGGCCAAGGGTTGCCCGGACAGGATTTCCGCGAGCGACGAGCATGTCTGGCTGTGCAACGCGCACCT  
CGCCGGCAGCAAGGCCCTTCCCCGCGCGTCTTGCCAAAGAGCGCGTCCATTAGTCAATCTCTGCA  
TCCCGGTTATGGGCGGGCGTGTGAGCTTGGTACAACTGACACGGTGCCTGACGACATCCCAAGGATA  
AGCCGAGCAACCGCGGCTTTCTGGGAGCCGAGTGCAGGAGCTCGGAAAGAGCCGAGCTCCAGCC  
CGTCAGGACGAGCAAACGAGACCGGCGAGGCCGAGCAGACGACGCGCACGTTTGGCTTCGAGGAAC  
TCGACCACAATAATGGCATGGACATAGAGGGCATGACCGCCGCGGGGGACACGGGCAGGAGGAGG  
AGCTAAGACTAAGAGAAGCCGAGGCCCTGTGACAGCAGCAAGCTGGAGCAGATCCCAAGGAGA  
TCGAGGAGTTCTACAGCCTCTGCGACGAAATGGACCTGCAGGGCGTACCACTACCGCTAGAGGACGG  
CTGGACCGTGGACGCGTCCAATTTGAGGTTCCCTGCTCTTCCCCGACGCCAGCGCCGCTCCGGTGG  
ACAGGGTACCGCTAACGTCGCCCGGACGCCTCAAGGGCACCCGCTACCGGCTCTCGCGCAGCAGAG  
TTTCTAGGCTGGAGGAGTCTCGCAGCAGTGTGCTGCTCCGACGACGACGCGCCGCGCAGCAGATG  
TGCCGGCCATCGAGGAGCCGAGAGATTGCTGAAGAAAGTGGTGGCCGGCGGGTGTCTGGGAGA  
GCTGTGGCGGCGCAGGGAGCAGCACAGGAAATGAGTGGCACTGGCACCACCAAGAACCACGTCATGT  
CGGAGCGAAAGCGACGAGAGAAGCTCAACGAGATGTTCTCGTCTCAAGTCACTGCTTCCGTCCATT  
CACAGGGTGAACAAAGCGTCGATCCTCGCCGAAACGATAGCCTACCTCAAGGAGCTTCAGAGAAGGG  
TGCAAGAGCTGGAGTCCAGTAGGGAACTCGCTCGCGCCATCCGAAACGAGCAAAAGGCTAATAAC  
AAGGCCCTCCCGTGGCAATAATGAGAGTGTGAGGAAGGAGGTCTGCGCGGGCTCCAAGAGGAAGAG  
CCCAGAGCTCGGCAGAGACGACGTGGAGCGCCCCCGTCTCATATGACGCGCGCACCAGCAAC  
GTCACCGTACCGTCTCGGACAAGGACGTCTCTGGAGGTGCAGTGCCTGGTGGGAGGAGCTCTGA  
TGACGAGTGTTCGACGCCATCAAGAGCTCCTTGGACGCTCTCTCGGTTACAGGGCCA  
GATGGCTTCATGGGGCTTAAGATACGAGCTCAGTTTGTGGTCCGGTCCGCTCGTGCCTGGATGAT  
CAGCGAGGCTCTTCGCAAAGCTATAGGGAAGCGGTGA

---

**ZmB**

ATGGCCCTGTCTGCTTGTCCAGCTCAAGAGGAACTTCTGCAACCTGCTGGTAGGCCACTGAGGAAGCA  
ACTTGCAGCTGCTGCTCGCAGCATCAACTGGTCTACTACTGTTCTGGTCCATCAGCTTACCCAGA  
GGCCAAGGGTTCTGACTTGGACCGATGGCTTCTACAACGGCGAGGTAAAGACCCGCAAGATCAGCCA  
CTCTGTTGAGCTGACCGCTGACAGCTTCTGATGACAGAGGTCTGAGCAGCTGAGAGAGCTTACGAGG  
CTCTGCAATCTGGTGAATGCGATAGAAGGGTGTAGGCCAGTTGGTCACTGTCTCCAGAGGATCTT  
GGCGATACCGAGTGGTACTACGTGATCTGTATGACCTACGCCTTCTTGGCAGATCAGGACTCTTGG  
TAGAAGCTCTGCTTCTAACGAGCAGCTGTGGTGTGCAACGCTCATCTTGTGGCTCTAAGGACTTCC  
CAAGGGCTCTGTTGGCTAAGGTTCCCGAGGATCCAGACCTGATCAACAGGGCTACTGCCGCTTTCAGG  
GAACCACAGTGCCTAATCTACTCCGAGCAGCCAAGCTCTAACCCTAAGCGCTGATGAGACTGGTGAGG  
CCGCTGATATCGCTGTTTTCGAGGGCTGGATCACAACGCCATGGACATGGAAACTGCCGGCATTGCT  
GTGTTTGAAGGCTCGACCAATAACGCTATGGATATGGAGACAGTTACCGGCTGCAGGCAGCATG  
GTACTGGTCAAGAACTTGGCGAGGCTGACAGCCATCTAACGCTTCTCTCGAGCATATCACCAGGGC  
ATCGACGAGTCTACAATCTGTGCGAAGAGATGGACGTGACGCCACTTGAGGACGCGCTGGATTATGG  
ACGGCTCTAACTTCGAGGTGCCAAGCAGTGCCTCCAGTGGACGGTCTTCTGTCTCTGTGATGGT  
TCTAAGGGCACTCTTTCGTTGGACTAGGCTAGGCTAGCCAGTCTGCTGACGCTTCCGAGGCTGTT  
CCAGTTATTGAGGAACCGCAGAAGCTCCTGAAGAAGGCTGTTGCTGGCGCGGTGCTTGGGCTAACA  
CTAATTGCGGAGGTGGCGGCACTACCGTACTGCACAAGAGAACGGCGCTAAGAACCACGTCATGTT  
GGAGAGAAAGAGGCGGAGAAAGCTGAACGAGATGTTCTGGTGTGAAGTCTCTGGTGGCAGCATC  
CATAAGGTGGACAAGGCTAGCATCCTGGCCGAGACTATCGCCTACCTAAGGAAGTCAAGCGCAGGG  
TGCAAGAGCTGAATCTAGAAGGCAAGGCGTCTGGTGCCTGTCAAAGAAGGTTTGGCTTGGCAG  
CAACTCCAAGCGCAAGTACCAGAGTTTCCCGGGGTGCTAAGGAACACCTTGGGTTTTGCCAATG  
GATGGACCAGCAACGTCGACCGTACTGTGCTGATAGGGATGTGCTGCTTGGAGGTGCAGTCTGCTGTG  
GGAAAAGCTGCTTATGACAGGGTTTTCCGACGCTCAAGAGCCTGATCTGGAGCTCTGTCTGTGCG  
AAGCTTACGCTTTCAGCGCTTATGAGGCTGAAGATCGGCGCTCAATTCGCTGGATCTGGCGCTGTT  
GTTCCAGGCATGATCTCTCAGAGCTTAGGAAGGCTATCGGCAAGAGGTGA

---

**AtGL1**

ATGAGAATAAGGAGAAGAGATGAAAAAGAGAATCAAGAATACAAGAAAGGTTTATGGACAGTTGAA  
GAAGACAACATCCTTATGGACTATGTTCTAATCATGGCACTGGCCAATGGAACCGCATCGTCAGAAA  
AACTGGGCTAAAGAGATGTGGGAAAAGTTGTAGACTGAGATGGATGAATTTATGGCCCTAATGTG  
AACAAGGCAATTTCACTGAACAAGAAGAAGACTCATTATTCGTCTCCACAAGCTCTCGGCAATA  
GATGGTCTTTGATAGCTAAAAGAGTACCGGGAAGAACAGATAAACAAGTCAAGTCAAGTCTGAAACAC  
TCATCTCAGCAAAAACTCGTCGGAGATTACTCTCCGCCGTCAAAAACCACCGGAGAAGACGACGAC  
TCTCCACCGTCATTGTTCACTGCCGCCACACCTTCTTCTGTCATCATCAACAAGAAAATATCTAC  
GAGAATATAGCCAAGAGCTTTAACGGCGTCTGATCAGCTTCGTACGAGGATAAACCAAAACAAGAAC  
TGGTCAAAAAGATGCTCAATGGCAACTACTAATGATCCAAGTCACTATTATGGCAATAACGCTTTA  
TGGGTTTCATGACGAGATTTTGGAGTCTAGTTCACTCGTAATGATGAATTTTGGTCTGGTGTGTTGAG

---

---

TACTGCCTTAG

---

*AtWER*

ATGAGAAAGAAAGTAAGTAGTAGTGGTGACGAAGGAAACAATGAGTACAAGAAAGGTTTGTGGACA  
GTAGAAGAAGACAAAAATCCTCATGGATTATGTCAAAGCTCATGGCAAAGGTCACCTGGAATCGTATTG  
CCAAAAAGACTGGTTTAAAGAGATGTGGAAAGAGTTGTAGATTGAGGTGGATGAATTATCTCAGCCC  
TAATGTGAAAAGAGGCAATTTACCCGAGCAAGAAGAGGATCTTATCATTAGGCTCCACAAGTTGCTT  
GGTAATAGGTGGTCTTTAATTGCTAAAAGAGTGCCGGGTGCAACGGATAATCAAGTGAAGAACTATT  
GGAACACGCATCTTAGTAAGAACTCGGAATCAAAGATCAGAAAAACCAACAGAGCAATGGTGATA  
TTGTTTATCAAATCAATCTCCCAATCTACCGAAACATCAGAAGAAACGAAAAATCTCGAATATTGTC  
GATAACAATAATATCTCGGAGATGAAATTCAAGAAGATCATCAAGGAAGTAACTACTTGAGTTAC  
TTGGGTTTCATGAGGATGAGTTTGAGCTTAGCACACTACCAACATGATGGACTTATAGATGGACAC  
TGTTTTGA

---

*AtPAP1*

ATGGAGGGTTCGTCCAAAGGGCTGCGAAAAGGTGCTTGGACTACTGAAGAAGATAGTCTCTTGAGAC  
AGTGCATTAATAAGTATGGAGAAGGCAAAATGGCACCAAGTTCCTGTAAGAGCTGGGCTAAACCGGTG  
CAGGAAAAGTTGTAGATTAAGATGGTTGAACATTTGAAGCCAAGTATCAAGAGAGGAAAACTTAGC  
TCTGATGAAGTCGATCTTCTTCTCGCCTTCATAGGCTTCTAGGGAATAGGTGGTCTTAATTGCTGGA  
AGATTACCTGGTCGGACCGCAATGACGTCAAGAATTACTGGAACACTCATCTGAGTAAGAAAACATG  
AACCGTGTGTAAGATAAAGATGAAAAAGAGAGACATTACGCCATTCTACAACACCGGCACTAAA  
AAACAATGTTTATAAGCCTCGACCTCGATCCTTCACAGTAAACAACGACTGCAACCATCTCAATGCC  
CACAAAAGTTGACGTTAATCTCCATGCCTTGGACTTAAATCAATAATGTTTGTGACAATAGTATC  
ATATACAACAAAAGATAAGAAGAAAGACCAACTAGTGAATAATTTGATTGATGGAGATAATATGTGGT  
TAGAGAAATCTTAGAGGAAAGCCAAGAGGTAGATATTTGGTTCCTGAAGCGACGCAACAGAAAA  
GGGGGACACCTTGGCTTTTGACGTTGATCAACTTTGGAGTCTTTTCGATGGAGAGACTGTGAAATTTG  
ATTAG

---

*AtPAP2*

ATGGAGGGTTCGTCCAAAGGGTGTAGGAAAGGTGCATGGACTGCTGAAGAAGATAGTCTCTTGAGGC  
TATGTATTGATAAGTATGGAGAAGGCAAAATGGCATCAAGTTCCTTTGAGAGCTGGGCTAAAATCGATG  
CAGAAAAGATTGTAGACTAAGATGGTTGAACATTTGAAGCCAAGTATCAAGAGAGGAAAGACTTAGC  
AATGATGAAGTTGATCTTCTTCTCGCCTTCATAAGCTTCTAGGAAATAGGTGGTCTTGATTGCTGGT  
CGATTGCCCTGGTCGGACCGCTAATGATGTCAAAAATTACTGGAACACCCATCTGAGTAAAAAACATG  
AGTCTTCGTGTTGTAAGTCTAAAAATGAAAAAGAAAAACATTAATTTCCCTCTACAACACCGGTCCAA  
AAAATCGGTGTTTTTAAGCCTCGACCTCGATCCTTCTCTGTTAACAATGGTTGCAGCCATCTCAATGGT  
CTGCCAGAAGTTGATTTAATCTTCATGCCTTGGACTCAAGAAAAATAATGTTTGTGAAAATAGTAT  
CACATGTAACAAAGATGATGAGAAAGATGATTTTGTGAATAATCTAATGAATGGAGATAATATGTGG  
TTGGAGAAATTTACTGGGGGAAAACCAAGAAAGCTGATGCGATTGTTCTGAAAGCGACGACAGCTGAAC  
ATGGGGCACCTTTGGCGTTTGACGTTGAGCAACTTTGGAGTCTGTTTGATGGAGAGACTGTTGAACTT  
GATTAG

---

*AtTT2*

ATGGGAAAGAGAGCAACTACTAGTGTGAGGAGAGAAAGAGTTAAACAGAGGAGCTTGGACTGATCAT  
GAAGACAAGATCCTTAGAGATTACATCACCACCTACGGCGAAGGCAAAATGGAGACTCTCCCTAACC  
AAGCTGGTCTCAAGAGGTGTGGCAAAAGCTGTAGACTTCGGTGGAAGAACTACCTAAGACCGGGGAT  
AAGCGCGGTAACATCTCATCTGATGAAGAAGAATCAATCCGTCCTCCTTCTGTTGAAACA  
GATGGTCTGTGATAGCTGGGAGGCTTCCAGGCCGAACAGACAATGAAATAAAGAATCATTGGAACCTC  
AAACCTCCGCAAAAGACTTCCCAAACTCAAACCAAGCAACCAAAACGATATAAAACATTCGACGAAC  
AACGAGAATAATGTATGTGTTATACGTACAAAGGCGATTAGGTGCTCAAAGACTCTTCTTCTCGGA  
TCTCTCTTTCAGAAGAAGAGTAGTACTAGTCCACTACCTCTGAAAGAACAAGAGATGGATCAAGGT  
GGATCTTCGTTGATGGGAGATCTCGAATTCGATTTCGATAGGATCCATTCCGATTTCACTCCCGGA  
TTGATGGATTTGATGGTTTGGACTGTGGAACGTTACATCTCTTGTTCATCTAACGAGATTTTGGG  
AGAGTTGGTTCTGCTCAAGTAATCTCGATCTCAATAGACCTTTCACTTCTTGTCATCATCGTGGCGA  
CGATGAAGATTGGCTCCGAGACTTCACTTGTGA

---

*AtMYB1*

ATGGGGAGACATTTCTGCTGTTACAAAACAAAAGCTGAGGAAAGGGCTTTGGTCTCCTGAAGAAGACG  
AGAAGCTTCTTACTCACATCACCAATCACGGCCATGGCTGCTGGAGCTCTGTCCCTAAACTCGTGGT  
TTGCAGAGATGTGGGAAGAGTTGTCGACTAAGATGGATCAATTACTTGAGACCTGATTTAAAGAGAG  
GAGCTTTTCTCCTGAAGAAGAGAATCTCATCGTCAACTCATGCCCCTTGGAAACAGATGGTCA  
CAGATTGCGTCAAGGCTTCCGGGTAGAACCAGAACGAGATCAAGAATCTATGGAACCAAGCATCA  
AGAAGAACTGAAACAAAGAGGCATTGACCCAAACACACACAAGCCATCTCTGAAGTTGAGAGTTT  
TAGCGACAAAGACAAAACAACAAGCAACAACAAAAGAAGCGGTAACGATCAACAAGTCTCCTAG  
TTCTCTTCTGCGACTAACCAAGACTTCTTCTCGAAAGGCCATCTGATTTATCCGACTACTTCGGATT  
TCGAAGCTTAACCTCAACTCAATCTAGGACTCTCTGTTACAACCTGATCTTCACTCTGCTCGATGAT  
TCCGCGCAGTTTAGCCCCGGGAACATGTTGGTCTGTCTTTCAGACACCAGTATGCGTAAAGCCCT  
CGATTAGTCTTCTCCCGACAACAACAGTTCGAGTCTTCTCCTCGGAGGAGATCATGTGAAATTTGGCT  
GCACAAAAGTGGGAATTTAGACAACAACAATAATACCTCAAATTTCTTCGACAATGGCGGATTCTC  
ATGGTCTATCCAAATTTCTTACTTCTTCTTCAAGTCAAACCAAAATCATAACTTCGAAGAAATAA  
AATGGTCAGAGTATTTGAACACACCGTCTTCTCATAGGGAGTACTGTACAGAGTCAAACCTCAACCA  
ATCTACATCAAATCAGAAACAGATTACTTAGCCAATGTTTCAAACATGACAGATCTTTGGAGCCAAA  
ACGAGAAGTGGGCACAACCTGAAACTAGTGACGTGTTCTCCAAGGATCTTCAGAGAATGGCCGTCTCT  
TTGGTCACTCCCTTAG

---

|                |                                                                                                                                                                                                                                                                                                                                                                                                                                                                                                                                                                                                                                                                                                                                                                                                                                                                                                                                                                                                                                                                                                                                                                                                                                                       |
|----------------|-------------------------------------------------------------------------------------------------------------------------------------------------------------------------------------------------------------------------------------------------------------------------------------------------------------------------------------------------------------------------------------------------------------------------------------------------------------------------------------------------------------------------------------------------------------------------------------------------------------------------------------------------------------------------------------------------------------------------------------------------------------------------------------------------------------------------------------------------------------------------------------------------------------------------------------------------------------------------------------------------------------------------------------------------------------------------------------------------------------------------------------------------------------------------------------------------------------------------------------------------------|
| <i>AaGL1</i>   | <p>ATGAGAATAAGGAGAAGATCAGAGAAAAGGAGAATCAAAAAGAGTACAAGAAAGTTTATGGACA<br/> GCTGAAGAAGACAACATCCTTATGGACTATGTCTTACTCACGGCAAAGGTCAATGGAACCCGATCG<br/> TCAGAAAACTGGGCTAAAGAGGTGTGGAAAAGTTGTAGACTGAGATGGATGAATTATTTGAGCCC<br/> TAATGTGAAGAAAAGGCAATTTACTGAACAAGAAGAAGACCTCATTATCCGTCTCCACAAGTCTCTA<br/> GGCAATAGATGGTCTTTGATAGCTAAAAGATACCAGGAAGAACAAGTCAAGAACTACT<br/> GGAACACTCATCTCAGCAAAAACTCGTGGAGATTACTCTCCGTCTGTCAAAACCCGGGAGACGA<br/> CGACTCTCCACCGTCTATGTTTCATCAACGTGACACAACCTCTCTCGTCATCCCAACAAAAAATA<br/> TTACAGGCAAGAACTTCGTATCAGCTTCGTACGAGAATAAACCGAAAACCTGGATTTGACGCAAGCAA<br/> CGTCATTTTCGCAACTACTAATGATGATCATCAAACCACTGTTATAGCAGTAATGCTTTTTGGGTAA<br/> TGAAGATGAGTTCGATCTGAGTTCACCTCGTGATGATGGATTTTGCTTCTGGTGATATTGGTACTGCCT<br/> CTAG</p>                                                                                                                                                                                                                                                                                                                                                                                                                                                                                                  |
| <i>AaWER</i>   | <p>ATGAGAAAGAAAGTAAAGTAGTAGTGGAGAAGAAGGAAAACAATGAGTACAAGAAAGTTTGTGGACA<br/> GTAGAAGAAGACAAGATCCTTATGGATTATGTCAAAGCTCATGGCAAAGGCCATTGGAATCGTATTG<br/> CCAAAAAGACAGGTCTAAAGAGATGTGGAAAAGATTGTAGATTGAGGTGGATGAATTACCTCAGCCC<br/> AAATGTAAGAAAGAGCAATTTACTGAGCAAGAAGAAGATCTTATCATTAGGCTCCACAAGCTGCTT<br/> GGTAATAGGTGGTCTTTGATTGCTAAACGAGTGCCGGGTCCGACGGATAATCAAGTGAAGAAATTATT<br/> GGAACACACATCTTAGTAAGAACTCGAATCAAAGATCCAAAAACCAACCAAGCAATAATGGTG<br/> AAATTGTTTATCAGATCAATCTCACGAATCTACCAGAAACATTAGAAGAAGAAAACAAAAATCTCGAA<br/> TATTCAGATGCCAATAATATTCATAGAGATGAAATTCAAGAAGATCGTCAAGGAAGTAACTACTTG<br/> AGTTCACTTTGGGTTATGAGGATGAGTTGAGCTTAGTACTCACCAACATGATGGATTTTATAGA<br/> CGGACACTGTTTTTAA</p>                                                                                                                                                                                                                                                                                                                                                                                                                                                                                                                                                     |
| <i>AaPAPL</i>  | <p>ATGGAGGGTACATCCAAAGGTTTAAAGAAAGGTGCATGGACAGCTGAAGAAGATAGTCTCTTGAGGC<br/> AATGTATTGATGCGTATGGAGAAGGCAAATGGCACCAAGTTTCTTAAAGAGCTGGGCTAAATCGGGT<br/> CAGGAAGAGTTGTAGACTAAGATGGTTGAACTATTTGAAGCCAAGTATCAAGAGGGAAGACTTAGC<br/> TCTGATGAAGTTGATCTTCTTCTCCGCCTTATAAATCTTAGGAAAATAGGTGGTCTTATTGATTGGT<br/> AGATTGCCCTGGCCGAACCGCTAACGACGTCAAGAATACTGGAACACCCATTTGAGTAAGAAACATG<br/> AACCTTGTGTAAAACCAAGATGAATAAGAGAAAAATTTACTTGCTTCTTACAACCTCCAGCCAAAA<br/> AATCGATGTTTTTAAAGCCTCGACCTCGATCCTTACTAGTAACAACGGCTGCAGCCGTCACAAATGGCC<br/> TGACAAAAGTTGACGTGAGTCTCCAATATGCCATGGACTCAACAACGATACTATTGTTGAAAACAGT<br/> ATCAAATGTAACAAAAGATGAGGAGAAAGATGAGCTAGTGAATAGTCTAATGGATGGAGAGAATATG<br/> TGGTGGGAGAGTTGCTACAAGAGAGCCAAGAGACAGAAGTGTGGATCCAGTACAGAAAAGGGG<br/> GCCACCTCGGCGTTGACATTGAGCAACTTTGGAGTCTCTTTGATGGAGAAAACAGTGGAACTTGATTA<br/> G</p>                                                                                                                                                                                                                                                                                                                                                                                                              |
| <i>GhMYB2</i>  | <p>ATGGCTCCAAAGAAGGCTGGAGTGAGCAAAAAGGTTTTTAAACAAAGTTTATGGACAGCTGAGGAAG<br/> ATAGAAGATTGGCTAAATATATTGAGATTCATGGTGCAAAGAGATGGAAAACAATCGCCATTAATC<br/> AGGTTTGAATCGATGCGGCAAGAGTTGACAGTTGAGATGGTTGAACTACTTGAGACCTAACATTAAG<br/> AGAGGCCAACATATCAGATGAAGAAGAGGACTTAATTTAGGCTTCATAAACTGCTGGGAAACAGGT<br/> TCTTTGATTGCTGGGAGACTTCCAGGGCGAACAGACAATGAAATTAAGAATACTGGAATTTCCCA<br/> TTTGAGCAAGAAAATGATAAACCATGATGTCAGAACAGAACAAAATCTCTCCTCGGAACAAATTGTG<br/> CCTCACAAGCATGGGAAACTGTCCAGATGGAAGAAGAAGAGGTAGTAAAAGGAAGTATGAAATT<br/> GAAAACCTGGAATTCAGCATTGATGTGGACGAATTTCTTTGACTTCTCAACGGAAGGTTGCTTTGGTTT<br/> GGATTGGGTGAATAAGTTCTTGAACCTTGATGACCAACAGGATCCATTAGCAATGGTATAA</p>                                                                                                                                                                                                                                                                                                                                                                                                                                                                                                                                                                               |
| <i>GhMYB25</i> | <p>ATGCAGCAGTCTCCATGTAGCGACAAGGTGGGGTTGAAGAAAGGGCCATGGACTCCAGAAGAAGAC<br/> CAAAAACCTCTGTCTTATATTCAAGAACACGGCGGTGGAAGCTGGCGAGGCTTGCCCGCAAAAAGCTG<br/> GACTTCAAAGATGTGGCAAGAGTTGTAGACTTAGGTGGATTAACACTTAAAGACCAGATATCAAAAAG<br/> AGGAAAGTTCAGTTCGACAGGAAGAACGAACCATCATCAACTCCACGCCCTTCTTGGAAAACAGGTGG<br/> TCGGCTATTGCGGCTCATTGCCCCAAAAGAACAGACAATGAGATCAAGAATACTGGAATAACACAGT<br/> TGAAGAAAAGGTTGACGACGATAGGGATCGAAGCTGCAACTCACAGGCTAAAACCGATACCTCCGG<br/> TTCAACTCCCAAGGATGCCGTAACCTTAGCCACATGGCTCAATGGGAGAGTGTCTCGGTTAGAAGCTG<br/> AAGCTAGATTGGTGAGAGAGTCAAAACGAGTTTCAAACCTCCGCAAAAACCAATTTAGGTTACAGTC<br/> TTCATCGGCTCCTCCACTGGTAAGCAAAATGATGTTGGTTTGGCTCATGCTACTAAACCGCAATGCC<br/> TCGATGTAACAAAGCTTGGCAACGTGTAGTCACTGGATTGTTCACTTTCAACACTGACAACCTCCAA<br/> TCTCCAACATCGACGTCGAGCTTACCGAAAACAGGTTACCAATCTCATCTGTCTGGGTTTATTGACAG<br/> CTTTGTGGGAACTCAAATAACAGCTGTTGCGGAAATAATTGGGAATGTGTGGAGAAATCGAGCCAA<br/> GTTGCTGAATTACAGGAAATATTGGATAACTCAATGGGGTTGCATGACATATTGGATCTCTCCTCAGA<br/> AGATGATAGGTTTCAAGGCTCATACAGGGCGGAAAATATGATGGAAGGGTATTCGGACACGTTAATG<br/> GTTTGTGATTCTGGGGATCATCCGAAGAGTTTGTCAATGGAGCCTAGACAAAACCTTAAATGTTGGAAC<br/> AAGTAATGCTAGTAGTTTCGAAGAAAACAAGAATTACTGGAACAACATCTTAATTTTGGCAATGCTT<br/> CCCCTTCTGGTTCTTCTGTCTTTGA</p> |
| <i>GhRLC1</i>  | <p>ATGGAGGGCTCATCTTTAAGAGTTAGAAAAGGTGCATGGACTGAAGAAGAAGACCTTCTTCTTAAAGA<br/> AATGTATTGAGAAATATGGTGAAGGAAAATGGCATCAAGTGCTGCTAGAGCTGGCTTGAATCGTTG<br/> CCGAAAAGCTGTAGACTGCGGTGGCTAAATTTTGAAGCCAAATATCAAGAGAGGACATTTTGTG<br/> GCTGATGAAGTTGACCTCATTATTCGCCTCCATAACCTCCTAGGTAATAGATGGTCACTGATTGCTGG<br/> TAGACTACCAGGAAGAACAGCAAAACGATGTGAAAAAATTTGGAACACCCACTTGGTAAAAAAAAT<br/> ATAGATACTTTTCAATTAACCTCGAACCCGAAATCTCATCAACTAAAACCTAATACTAAGCAACAAGC<br/> AACACGTGGTATTGGCTAACTGCGGTGACAACCAGATGGATACTGTTCCCTGACCATGATGAGAT<br/> CATGTGGTGGGAAAAATATGATGATGAATGAAAAGGAGGTTGATGGCCATCAGTACAATGTTACGCC<br/> AATGACATTGATGAAAAGTGTGTTGGACCAAAATTAATGAATGAAGACAATTTGGCAACTACTATGGATG<br/> AGCTTTTTCTGTATGAGGAACCGTGAATGTGTTCAACCCATAG</p>                                                                                                                                                                                                                                                                                                                                                                                                                                                                                                                    |

*PhAN2*

ATGAGTACTTCTAATGCATCAACATCAGGAGTAAGAAAAGGTGCATGGACCGAGGAAGAAGATCTT  
TATTGAGAGAATGCATTGAGAAGTATGGAGAAGGAAAGTGGCATCTAGTTCAGTTAGAGCTGGTCT  
GAATAGATGCAGGAAAAGTTGCAGACTTAGGTGGTTGAATTATCTAAGGCCACATATAAAAAGAGGG  
GACTTCTCTTTGGATGAAGTAGATCTCATTTTGGGCTTCATAAGCTTCTAGGCAACAGATGGTCACT  
GTAGCTGGTAGACTTCCTGGAAGAACAGCAAACGATGTCAAAAACCTATTGGAACACCCACCTTCGAA  
AGAAGTTAATTGCTCCTCATGATCAGAAACAAGAGAGCAAGAAACAAAGCCATGAAAAATTACCGAGA  
ACAACATAATAAAACCTCGTCTCAGACCTTCTCAAGGCCGGCAATGAATCATGTTTCTTGTGGAAC  
GGCAAAAGTTGTAGTAAAAACACTATAGACAAGAATGAAGGTGACACCGAAATAATAAGTTTGTAGT  
ATGAGAAGCAAAAACCGGAAGAATCGATAGATGATGGACTTCAATGGTGGGCAAATTTATTAGCCAA  
CAACATTGAGATTGAGGAATTTAGTTAGTTGTAATTCACCAACATTGTTGCATGAGGAAAACAGCACCAT  
CGGTAATGTGAAAGCAGCCTTACTCAAGGAGGAGGAAGTGGCTTAAGTGACTTTTCAGTTGATATT  
GATGACATATGGGATTTAGTTAGTTAG

*PhAN4*

ATGAAAACCTCTGTTTTTACGTCGTCGGGGTACTGAGAAAAGTTTCATGGACTGAAGAAGAAGATA  
TTCTTTTGGAGAAATGTATTGAGAAGTACGGGGAAGGAAAAGTGGCATCAAGTTCCTGTTAGAGCTGG  
TTTGAATAGATGCAGGAAGAGTTGCAGACTAAGGTGGATGAATTATCTAAGGCCACATATAAAGAGA  
GGTGACTTCTCTCCAGATGAAGTGGATCTTATTTGAGGCTTCATAAGCTTCTTGGCAACAGGTGGTC  
ACTTATTGCTGGGAGACTTCCGGGAACAGCAACGATGTGAAAAACTACTGGAACACCTTCGAA  
CTAAGGAGGTCAAAGTTTGTCTCCTCAGCAACACGATAGGAAATGTCTAAAGCAATTAAGACCA  
TGGCCAAGAATGCCATAATAAGACCTCAACCTCGGAACCTCTCAAAATTAGCAAAGAATAACGTGAG  
TACTATACACAAGGATGAACATAGCAAAACAGGAAATTCATCGAGAAGCCACGACGGCCGAAGT  
GTGTCAGAGACGAGAACGTTGAATGGTGGACGAATTTACTGGAATACTCAACGAACTTGGAA  
AGGCAACTGAAAAGCACTTACGATTTAAGAACATAGAAAAGTTTGTAAAACGAAGAATTATATC  
ACCATCGATAAATGGTGAACCTACTATCCCATGCAAGAACTAGAGACATGGGTTGGAGTGACCTT  
TCTATTGATGCTGACCTCTGGGAATTACTATAG

*PhPH4*

ATGAGAACCCCATCATCATCAACAACAAGCAACAAGTAACACCATGTTGTAGCAAGGTAGGGT  
TAAAAAGAGGTCCATGGACACCAGAAGAAGTGAATATTGACAAAATTATATAAATAAAGAAGGAG  
AAGGACGGTGGCGAACGTTGCCAAAAGAAGGCGGGGCTCCTCCGTTGTGGAAAAAGCTGCCGCCTCG  
GTGGATGAATTACCTCCGTCCTTCAGTTAAACGTGGCCATATTGCACCTGATGAAGAAGATCTCATTC  
TTCGCTCCATCGTCTCCTTGGCAACAGGTGGTCCCTTGATAGCTGGGAGAATTCAGGGGAGAACAGAT  
AATGAGATAAAGAATTATTGGAACACTCACCTTAGCAAGAAGTTAATCAGTCACGGAATAGATCCTA  
GAACTCACAAGCCATTGAAAACTTAATTCCTCAAGTGATGATATTACCAACAAATTAGCTTCTTCT  
TCTCTCTTCTCATCTTCAAAGCAAAATGATCTCAATCCAATTCTAAGCCCCACTTACATTTCTAGTTTT  
CAAATGGGAAGAACCATTAGGAAAAATCAATACTCACCCGGGAGAAATTACTAGTCTTGTATGATCAAT  
ATCAAAGTAACGCGATTCTTGCCGAGTATGGTGTGATCTGAATATTGCGGTTACTATTGAGGAAGAT  
GTTGAAATGAATTGTTGCACGGATGATGTTTTCTCTCTTCTTGAATCTTTGATCAATGAAGATATG  
TTCGCTTGCCAAAACCAACAACCAACGGGACGTTCCAAGATTTTGTATCCTTTCATGGCTTCATCATC  
TACACCTTCATCTGATCAATATAATCCAGTTAG

*ZmC1*

ATGGGGAGGAGGGCGTGTGCGCAAGGAAGGCGTTAAGAGAGGGGCGTGGACGAGCAAGGAGGA  
CGATGCCTTGGCCGCTACGTCAAGGCCATGGCGAAGGCAAATGGAGGGAAGTGCCCCAGAAAGCC  
GGTTTGCCTCGGTGCGCAAGAGCTGCCGGTGCCTGGTGAACACTCCTCCGGCCCAACATCAGGC  
GCGGCAACATCTCTACGACGAGGAGGATCTCATGATCATCCGCCTCCACAGGCTCCTCGGCAACAG  
GTGGTCTGATTGCAGGCAGGCTGCCTGGCCGAACAGACAATGAAATCAAGAACTACTGGAACAGC  
ACGCTGGGCCGGAGGGCAGGCGCCGGCCGGCGCTGGCGGCAGCAGGGTCTGTCATCGCGCCGGAC  
ACCGGCTCGCACGCCACCCCGCCGCGACGTCGGGCAGCGGCGAGACCGGCCAGAAGGGCGCCGCTC  
CTCGCGCGGACCCCTGACTCAGCCGGGACGACGACCTCGGCGGCGGCGGTGTGGGCGCCCAAGGC  
CGTGGGTTGCACGGGCGGACTCTTCTTCTCACCCGGGACACGACGCGGCGCACGCGGGCGAGACG  
GCGACGCCAATGGCCGGAGGAGGATTAGGAGGAGAAGCAGGGTCTGGAAGATTGACAGCTCAGCG  
GCGTGGTATCGCTCTCGTCGGAAGCCAGGACGAGCCGTGCTTCTCGGCGACGGTACTGCGACTG  
GATGGACGACGTGAGGGCCCTGGCGTCTTTCTCGAGTCCGACGAGGACTGGCTCCGCTGTCAGACG  
GCCGGGACGCTTGGCTAG

*ZmPL*

ATGGGCCGAGGGCTTGTGTGCTAAGGAAGGTGTTAAGAGGGGCGCTGGACCGCCAAGGAAGATG  
ATACTCTGGCCGCTACGTGAAGGCTCATGGTGAAGGCAAGTGGCGGAGGTGCCACAAAAGGCTGG  
TCTTAGAAGGTGCGGCAAGAGCTGCAGGCTGCGCTGGCTTAACCTACCTGAGGCCGAACATCAAGAGG  
GGCAACATCAGTACGACGAAGAGGACCTGATCGTGGGCTGCACAAGCTGCTTGGCAACAGGTGGT  
CACTGATCGCTGGCAGACTTCCAGGCAAGGACCAACGAGATCAAGAACTGGAACAGCACCT  
CGGCAGACGCGCTGGCGTGGTGCAGGCGCTGGTGGTTCTAGAGTTGTGTTGCTCCAGACACCGGC  
AGCCATGCTACTCCAGCTGCTGCTGGCAGCAGAGATGACTGGCGGTCAAAGGGTGGCCGCTCCAA  
GGCTGATCTTGGCTCTCCAGGTTCTGCTGCTGGTGTGGGCTCAAAGGCTGCTAGATGCATCAAGC  
GGTGTCTTCCACAGGCGCGATACCCACATGCTGGCGGTACTGACTCCGACCTCCGACCCCAAT  
GATGGCTGGCGGTGCTGGTGGTGAAGCTAGGTCTAGCGACGACTGCAGCTGCTGCTTCTGTGTCTG  
TGTCTCACTGGTGGGCGACTCTCAGCAGACCCATGCTTCTGCTGGTACGGCAACGGCGACTGGATG  
GACGATGTTAGGGCTTGGCTAGCTTCTCGAGAGCGACGAGGAATGGGTGAGGTGCCATACTGCTG  
AGCAGCTGGT

*ZmP1*

ATGGGGAGGGCGCCGTGCTGCGAGAAGGTGGGGCTCAAGCGAGGGAGGTGGACGGCGGAAGAGGAC



---

CAGTTACTGCCAACACTACATTGCGGAGCACGGCGAGGGGTCCTGGAGGTCGCTGCCAAGAATGCAG  
GCCTGCTCCGGTGCGGCAAGAGCTGCCGGCTCCGGTGGATCAACTACCTTCGGGCGGACGTCAAGAG  
GGGAACATCTCCAAGGAGGAAGAAGACATCATCAAGTCCACGCCACCCTCGGCAACAGGTGG  
TCCCTGATCGCCAGCCACCTCCCCGGCCGAACAGACAACGAGATCAAGAACTACTGGAACCTGCACC  
TCAGCCGGCAGATCCACACGTACCGCCGAAATACACCGCCGGGCTGACGACACCGCCATCGCCAT  
CGACATGAGCAAGCTGCAGAGCGCCGACAGGCGGCGCGGCGGCAGGACCCCGGGCCGGCCCGCAA  
GGCTAGCGCCAGCAGGACCAAGCAGGCGGACGCCGATCAGCCCGGCGGCGAGGCGAAAGGCCCGGC  
CGCGGCGGGCTCGAGCCCGCGGCACAGCGACGTGGTGAACCCGGGCCCCGAACCAGCCAAACAGCAG  
CAGCGGCAGCACGGGCACGGCCGAGGAGGAGGGGCCAGCAGCGAGGACGCGAGCGGGCCGTGGGT  
GCTGGAGCCGATAGAGCTCGGGGACCTAGTCTGGGGGAGGCCGACAGCGAGATGGACGCCCTGAT  
GCCTATCGGGCCCGGGCCACGACTCGGCTGCCCTCGAAGGGCTTGGCGGGTCCGGCTGCGAGGCC  
CAGGTGGACGACCTGTTTCGACATGGACTGGGATGGCTTCGCGGCCCATCTGTGGGGCGGGCCGGAGC  
AGGACGAGCACAGCGCGCAGCTGCGGCAGGCCGCCGAGCCGCTGGAAGTTGCTGCTGCTGCTGCTGC  
TGCGACGGCGGCCCGCACCCCGACGATCGCGAGCTGGAGGCGTTTCGAGACTTGGCTCCTGTCCGAC  
TCGTTC

---

**Table S10. Plasmids**

| <b>Stock No.</b> | <b>Gene name</b> | <b>TF family</b> | <b>TF name</b> | <b>Vector</b>     |
|------------------|------------------|------------------|----------------|-------------------|
| UT6678           | PAC1             | WD40             | ZmWD40         | pENTR/SD/D-TOPO   |
| UT3027           | R(Lc)            | bHLH             | ZmbHLH1        | pENTR/SD/D-TOPO   |
| UT4953           | B1               | bHLH             | ZmbHLH2        | pENTR/SD/D-TOPO   |
| UT6677           | C1               | R2R3MYB          | ZmMYB1         | pENTR/SD/D-TOPO   |
| UT4632           | PL1              | R2R3MYB          | ZmMYB2         | pENTR/SD/D-TOPO   |
| UT6679           | P1               | R2R3MYB          | ZmMYB3         | pENTR/SD/D-TOPO   |
| 468              | AN2              | R2R3MYB          | PhMYB          | pC-ACT2-attR (AD) |
| 452              | AN4              | R2R3MYB          | PhMYB          | pC-ACT2-attR (AD) |
| 517              | PH4              | R2R3MYB          | PhMYB          | pC-ACT2-attR (AD) |
| 477              | AN1              | bHLH             | PhbHLH         | pC-ACT2-attR (AD) |
| 484              | JAF13            | bHLH             | PhbHLH         | pC-ACT2-attR (AD) |
| 930              | AN11             | WD40             | PhWD40         | pENTR1A           |

**Table S11. Primers**

| <b>Name</b>    | <b>Sequence information</b>                          |
|----------------|------------------------------------------------------|
| attB-AtTTG1-F  | GGGGACAAGTTTGTACAAAAAAGCAGGCTTAATGGATAATTCAGCTCCAGA  |
| attB-AtTTG1-R  | GGGGACCACTTTGTACAAGAAAGCTGGGTTTCAAACCTCTAAGGAGCTGCA  |
| attB-AtGL3-F   | GGGGACAAGTTTGTACAAAAAAGCAGGCTTAATGGCTACCGGACAAAACAG  |
| attB-AtGL3-R   | GGGGACCACTTTGTACAAGAAAGCTGGGTTAACTAAGTAGTCTTCAACAG   |
| attB-AtEGL3-F  | GGGGACAAGTTTGTACAAAAAAGCAGGCTTAATGGCAACCGGAGAAAACAG  |
| attB-AtEGL3-R  | GGGGACCACTTTGTACAAGAAAGCTGGGTTTAAACATATCCATGCAACCC   |
| attB-AtTT8-F   | GGGGACAAGTTTGTACAAAAAAGCAGGCTTAATGGATGAATCAAGTATTAT  |
| attB-AtTT8-R   | GGGGACCACTTTGTACAAGAAAGCTGGGTTCTATAGATTAGTATCATGTA   |
| attB-AtMYC1-F  | GGGGACAAGTTTGTACAAAAAAGCAGGCTTAATGTCTTTGACAATGGCTGA  |
| attB-AtMYC1-R  | GGGGACCACTTTGTACAAGAAAGCTGGGTTTTAATGAAAGATACAAAATCG  |
| attB-AtGL1-F   | GGGGACAAGTTTGTACAAAAAAGCAGGCTTAATGAGAATAAGGAGAAGAGA  |
| attB-AtGL1-R   | GGGGACCACTTTGTACAAGAAAGCTGGGTTCTAAAGGCAGTACTCAACAT   |
| attB-AtWER-F   | GGGGACAAGTTTGTACAAAAAAGCAGGCTTAATGAGAAAGAAAGTAAGTAG  |
| attB-AtWER-R   | GGGGACCACTTTGTACAAGAAAGCTGGGTTTCAAAAACAGTGTCATCTA    |
| attB-AtPAP1-F  | GGGGACAAGTTTGTACAAAAAAGCAGGCTTAATGGAGGGTTCGTCCAAAGG  |
| attB-AtPAP1-R  | GGGGACCACTTTGTACAAGAAAGCTGGGTTCTAATCAAATTTACAGTCT    |
| attB-AtPAP2-F  | GGGGACAAGTTTGTACAAAAAAGCAGGCTTAATGGAGGGTTCGTCCAAAGG  |
| attB-AtPAP2-R  | GGGGACCACTTTGTACAAGAAAGCTGGGTTCTAATCAAGTTCAACAGTCT   |
| attB-AtTT2-F   | GGGGACAAGTTTGTACAAAAAAGCAGGCTTAATGGGAAAGAGAGCAACTAC  |
| attB-AtTT2-R   | GGGGACCACTTTGTACAAGAAAGCTGGGTTTCAACAAGTGAAGTCTCGGA   |
| attB-AtMYB61-F | GGGGACAAGTTTGTACAAAAAAGCAGGCTTAATGGGGAGACATTTCTTGCTG |
| attB-AtMYB61-R | GGGGACCACTTTGTACAAGAAAGCTGGGTTCTAAAGGGACTGACCAAAAAG  |
| attB-AaTTG1-F  | GGGGACAAGTTTGTACAAAAAAGCAGGCTTAATGGATAACTCAGCTCCAGA  |
| attB-AaTTG1-R  | GGGGACCACTTTGTACAAGAAAGCTGGGTTTCAAACCTCTAAGGAGCTGCA  |
| attB-AaGL3-F   | GGGGACAAGTTTGTACAAAAAAGCAGGCTTAATGGCTTCCGGACAAAACAG  |
| attB-AaGL3-R   | GGGGACCACTTTGTACAAGAAAGCTGGGTTTCAACAGATCCATGCAACCC   |

---

|                    |                                                     |
|--------------------|-----------------------------------------------------|
| attB-AaEGL3-F      | GGGGACAAGTTTGTACAAAAAAGCAGGCTTAATGGCTGCCGGAGAAAACAG |
| attB-AaEGL3-R      | GGGGACCACTTTGTACAAGAAAGCTGGGTTTTAACATATCCATGCAACTC  |
| attB-AaTT8-F       | GGGGACAAGTTTGTACAAAAAAGCAGGCTTAATGGATGAATCAAGTACGAT |
| attB-AaTT8-R       | GGGGACCACTTTGTACAAGAAAGCTGGGTTCTATAGTATAGTATTGGATA  |
| attB-AaMYC1-F      | GGGGACAAGTTTGTACAAAAAAGCAGGCTTAATGTCTTTGACAATGGATGA |
| attB-AaMYC1-R      | GGGGACCACTTTGTACAAGAAAGCTGGGTTTCATCAAAACACTCGGAAAAC |
| attB-AaGL1-F       | GGGGACAAGTTTGTACAAAAAAGCAGGCTTAATGAGAATAAGGAGAAGATC |
| attB-AaGL1-R       | GGGGACCACTTTGTACAAGAAAGCTGGGTTCTAGAGGCAGTAACCAATAT  |
| attB-AaWER-F       | GGGGACAAGTTTGTACAAAAAAGCAGGCTTAATGAGAAAGAAAGTAAGTAG |
| attB-AaWER-R       | GGGGACCACTTTGTACAAGAAAGCTGGGTTTTAAAACAGTGTCCGTCTA   |
| ANS655 AaPAP-s     | AACCCACAACATATACCCTCTTCC                            |
| ANS656 AaPAP-as    | CAAAAGTACTCGCACACAAACAC                             |
| ANS657 AaPAP-attB1 | GGGGACAAGTTTGTACAAAAAAGCAGGCTTAATGGAGGGTACATCCAAAGG |
| ANS658 AaPAP-attB2 | GGGGACCACTTTGTACAAGAAAGCTGGGTTCTAATCAAGTTCCACTGTTTC |
| attB-GhTTG1-F      | GGGGACAAGTTTGTACAAAAAAGCAGGCTTAATGGAGAATTCAACTCAGGA |
| attB-GhTTG1-R      | GGGGACCACTTTGTACAAGAAAGCTGGGTTTCAAACCTTTGAGAAGCTGCA |
| attB-GhTTG2-F      | GGGGACAAGTTTGTACAAAAAAGCAGGCTTAATGGCCGCTAGCAGCGATCC |
| attB-GhTTG2-R      | GGGGACCACTTTGTACAAGAAAGCTGGGTTTCATACCCTGAGAATCTGAA  |
| attB-GhTTG3-F      | GGGGACAAGTTTGTACAAAAAAGCAGGCTTAATGGAGAATTCAACTCAAGA |
| attB-GhTTG3-R      | GGGGACCACTTTGTACAAGAAAGCTGGGTTTCAAACCTTTGAGAAGCTGCA |
| attB-GhTTG4-F      | GGGGACAAGTTTGTACAAAAAAGCAGGCTTAATGACGGCCACCAGCGATCC |
| attB-GhTTG4-R      | GGGGACCACTTTGTACAAGAAAGCTGGGTTTCATACCCTTAGAATCTGAA  |
| attB-GhDEL61-F     | GGGGACAAGTTTGTACAAAAAAGCAGGCTTAATGGCTACTACTGGGGTTCA |
| attB-GhDEL61-R     | GGGGACCACTTTGTACAAGAAAGCTGGGTTTTACACAAAGGTTAAAGATT  |
| attB-GhDEL65-F     | GGGGACAAGTTTGTACAAAAAAGCAGGCTTAATGTCTACTGGAGTTCAACA |
| attB-GhDEL65-R     | GGGGACCACTTTGTACAAGAAAGCTGGGTTTCAACACTTGCTAGCAATTC  |
| attB-GhMYB2-F      | GGGGACAAGTTTGTACAAAAAAGCAGGCTTAATGGCTCCAAAGAAGGCTGG |

---

---

|                |                                                      |
|----------------|------------------------------------------------------|
| attB-GhMYB2-R  | GGGGACCACTTTGTACAAGAAAGCTGGGTTTTATACCATTGCTAATGGAT   |
| attB-GhMYB25-F | GGGGACAAGTTTGTACAAAAAAGCAGGCTTAATGCAGCAGTCTCCATGTAG  |
| attB-GhMYB25-R | GGGGACCACTTTGTACAAGAAAGCTGGGTTTCAAAAAGACAGAAGAACCAG  |
| attB-GhRLC1-F  | GGGGACAAGTTTGTACAAAAAAGCAGGCTTAATGGAGGGCTCATCTTTAAG  |
| attB-GhRLC1-R  | GGGGACCACTTTGTACAAGAAAGCTGGGTTCTATGGGTTGAACACATTCC   |
| attB-PhAN11-F  | GGGGACAAGTTTGTACAAAAAAGCAGGCTTAATGGAAAATTC AAGTCAAGA |
| attB-PhAN11-R  | GGGGACCACTTTGTACAAGAAAGCTGGGTTTACTTTAAGCAATTGCAACT   |
| attB-PhJAF13-F | GGGGACAAGTTTGTACAAAAAAGCAGGCTTAATGGCTATGGGATGCAAAGA  |
| attB-PhJAF13-R | GGGGACCACTTTGTACAAGAAAGCTGGGTTAGATTTCCAGACTACTCGCT   |
| attB-PhAN1-F   | GGGGACAAGTTTGTACAAAAAAGCAGGCTTAATGCAGCTGCAAACCATGTT  |
| attB-PhAN1-R   | GGGGACCACTTTGTACAAGAAAGCTGGGTTTTAACTCTAGGGATTA ACT   |
| attB-PhAN2-F   | GGGGACAAGTTTGTACAAAAAAGCAGGCTTAATGAGTACTTCTAATGCATC  |
| attB-PhAN2-R   | GGGGACCACTTTGTACAAGAAAGCTGGGTTCTAACTAACTAAAATCCCATA  |
| attB-PhAN4-F   | GGGGACAAGTTTGTACAAAAAAGCAGGCTTAATGAAA ACTTCTGTTTTTAC |
| attB-PhAN4-R   | GGGGACCACTTTGTACAAGAAAGCTGGGTTCTATAGTAATTCCCAGAGGT   |
| attB-PhPH4-F   | GGGGACAAGTTTGTACAAAAAAGCAGGCTTAATGAGAACCCCATCATCATC  |
| attB-PhPH4-R   | GGGGACCACTTTGTACAAGAAAGCTGGGTTCTAACTGGGATTATATTGAT   |
| attB-ZmPAC1-F  | GGGGACAAGTTTGTACAAAAAAGCAGGCTTAATGGACCCACCCAAGCCGCC  |
| attB-ZmPAC1-R  | GGGGACCACTTTGTACAAGAAAGCTGGGTTGACCCTAAGAAGCTGGACCT   |
| attB-ZmMP1-F   | GGGGACAAGTTTGTACAAAAAAGCAGGCTTAATGGGCGGAGTCGGCGAAGG  |
| attB-ZmMP1-R   | GGGGACCACTTTGTACAAGAAAGCTGGGTTTCAGACCCTGAGAATCTGAA   |
| attB-ZmR-F     | GGGGACAAGTTTGTACAAAAAAGCAGGCTTAATGGCGCTTTCAGCTTCCCG  |
| attB-ZmR-R     | GGGGACCACTTTGTACAAGAAAGCTGGGTTTCACCGCTTCCCTATAGCTT   |
| attB-ZmB-F     | GGGGACAAGTTTGTACAAAAAAGCAGGCTTAATGGCCCTGTCTGCTTGTCC  |
| attB-ZmB-R     | GGGGACCACTTTGTACAAGAAAGCTGGGTTCCCTCTTGCCGATAGCCTTCC  |
| attB-ZmPL-F    | GGGGACAAGTTTGUACAAAAAAGCAGGCTTAATGGGCCGCAGGGCTTGCTG  |
| attB-ZmPL-R    | GGGGACCACTTTGTACAAGAAAGCTGGGTTAACCAGCUTGCTCAGCAGTAT  |
| attB-ZmC1-F    | GGGGACAAGTTTGTACAAAAAAGCAGGCTTAATGGGGAGGAGGGCGTGTG   |

---

---

|                 |                                                     |
|-----------------|-----------------------------------------------------|
| attB-ZmC1-R     | GGGGACCACTTTGTACAAGAAAGCTGGGTTTCACGCAAGCTGCCCGGCCG  |
| attB-ZmP1-F     | GGGGACAAGTTTGTACAAAAAAGCAGGCTTAATGGGGAGGGCGCCGTGCTG |
| attB-ZmP1-R     | GGGGACCACTTTGTACAAGAAAGCTGGGTTGAACGAGTCGGACAGGAGCC  |
| PrimerF (F177I) | GTTAAGACAGTGGTTTGCATTCCGTTTCCTTGGAGGAGTC            |
| PrimerR (F177I) | GACTCCTCCAAGGAACGGAAATGCAAACCACTGTCTTAAC            |
| PrimerF (P377D) | TCAGTTAATTCTCGGAGATCAGTTTCGAAACTGCGAT               |
| PrimerR (P377D) | ATCGCAGTTTCGAAACTGATCTCCGAGAATTAACTGA               |
| PrimerF(D477G)  | CGATAAAGTATCGATTCTTGGAGATACGATAGAGTATCTTC           |
| PrimerR(D477G)  | GAAGATACTCTATCGTATCTCCAAGAATCGATACTTTATCG           |
| PrimerF(S589H)  | GAGATAATGGATGTGATTGATGATCTCCATTTGGATTC              |
| PrimerR(S589H)  | GAATCCAAATGGAGATCATGAATCACATCCATTATCTC              |

---

Please note: The AaPAPL CDS was cloned by amplifying the respective region with ANS655 and ANS656 followed by amplification using Gateway® specific primers (ANS657,658).

## References:

- Albert NW, Davies KM, Lewis DH, Zhang H, Montefiori M, Brendolise C, Boase MR, Ngo H, Jameson PE, Schwinn KE. 2014. A Conserved Network of Transcriptional Activators and Repressors Regulates Anthocyanin Pigmentation in Eudicots. *The Plant Cell Online*.
- Baudry A, Caboche M, Lepiniec L. 2006. TT8 controls its own expression in a feedback regulation involving TTG1 and homologous MYB and bHLH factors, allowing a strong and cell-specific accumulation of flavonoids in *Arabidopsis thaliana*. *The Plant Journal* 46:768-779.
- Baudry A, Heim MA, Dubreucq B, Caboche M, Weisshaar B, Lepiniec L. 2004. TT2, TT8, and TTG1 synergistically specify the expression of BANYULS and proanthocyanidin biosynthesis in *Arabidopsis thaliana*. *The Plant Journal* 39:366-380.
- Bernhardt C, Lee MM, Gonzalez A, Zhang F, Lloyd A, Schiefelbein J. 2003. The bHLH genes GLABRA3 (GL3) and ENHANCER OF GLABRA3 (EGL3) specify epidermal cell fate in the *Arabidopsis* root. *Development* 130:6431-6439.
- Feller A, Hernandez JM, Grotewold E. 2006. An ACT-like Domain Participates in the Dimerization of Several Plant Basic-helix-loop-helix Transcription Factors. *Journal of Biological Chemistry* 281:28964-28974.
- Goff SA, Cone KC, Chandler VL. 1992. Functional analysis of the transcriptional activator encoded by the maize B gene: evidence for a direct functional interaction between two classes of regulatory proteins. *Genes & Development* 6:864-875.
- Grotewold E, Sainz MB, Tagliani L, Hernandez JM, Bowen B, Chandler VL. 2000. Identification of the residues in the Myb domain of maize C1 that specify the interaction with the bHLH cofactor R. *Proceedings of the National Academy of Sciences* 97:13579-13584.
- Hernandez JM, Heine GF, Irani NG, Feller A, Kim M-G, Matulnik T, Chandler VL, Grotewold E. 2004. Different Mechanisms Participate in the R-dependent Activity of the R2R3 MYB Transcription Factor C1. *Journal of Biological Chemistry* 279:48205-48213.
- Kong Q, Pattanaik S, Feller A, Werkman JR, Chai C, Wang Y, Grotewold E, Yuan L. 2012. Regulatory switch enforced by basic helix-loop-helix and ACT-domain mediated dimerizations of the maize transcription factor R. *Proceedings of the National Academy of Sciences of the United States of America* 109:E2091-E2097.
- Liang G, He H, Li Y, Ai Q, Yu D. 2014. MYB82 functions in regulation of trichome development in *Arabidopsis*. *Journal of Experimental Botany* 65:3215-3223.
- Morohashi K, Grotewold E. 2009. A Systems Approach Reveals Regulatory Circuitry for *Arabidopsis* Trichome Initiation by the GL3 and GL1 Selectors. *PLOS Genetics* 5:e1000396.
- Morohashi K, Zhao M, Yang M, Read B, Lloyd A, Lamb R, Grotewold E. 2007. Participation of the *Arabidopsis* bHLH Factor GL3 in Trichome Initiation Regulatory Events. *Plant Physiology* 145:736-746.
- Payne CT, Zhang F, Lloyd AM. 2000. GL3 encodes a bHLH protein that regulates trichome development in *Arabidopsis* through interaction with GL1 and TTG1. *Genetics* 156:1349-1362.
- Pesch M, Schultheiß I, Digiuni S, Uhrig JF, Hülskamp M. 2013. Mutual control of intracellular localisation of the patterning proteins AtMYC1, GL1 and TRY/CPC in *Arabidopsis*. *Development* 140:3456-3467.
- Quattrocchio F, Verweij W, Kroon A, Spelt C, Mol J, Koes R. 2006. PH4 of *Petunia* Is an R2R3 MYB Protein That Activates Vacuolar Acidification through Interactions with Basic-Helix-Loop-Helix Transcription Factors of the Anthocyanin Pathway. *The Plant Cell* 18:1274-1291.
- Shangguan X-X, Yang C-Q, Zhang X-F, Wang L-J. 2016. Functional characterization of a basic helix-loop-helix (bHLH) transcription factor GhDEL65 from cotton (*Gossypium hirsutum*). *Physiologia Plantarum* 158:200-212.
- Spelt C, Quattrocchio F, Mol J, Koes R. 2002. ANTHOCYANIN1 of *Petunia* Controls Pigment Synthesis, Vacuolar pH, and Seed Coat Development by Genetically Distinct Mechanisms. *The Plant Cell* 14:2121-2135.
- Symonds VV, Hatlestad G, Lloyd AM. 2011. Natural Allelic Variation Defines a Role for ATMYC1: Trichome Cell Fate Determination. *PLOS Genetics* 7:e1002069.

- Tominaga R, Iwata M, Okada K, Wada T. 2007. Functional Analysis of the Epidermal-Specific MYB Genes *CAPRICE* and *WEREWOLF* in *Arabidopsis*. *The Plant Cell* 19:2264-2277.
- Wan Q, Zhang H, Ye W, Wu H, Zhang T. 2014. Genome-Wide Transcriptome Profiling Revealed Cotton Fuzz Fiber Development Having a Similar Molecular Model as *Arabidopsis* Trichome. *PLOS ONE* 9:e97313.
- Wang G, Zhao G-H, Jia Y-H, Du X-M. 2013. Identification and Characterization of Cotton Genes Involved in Fuzz-Fiber Development. *Journal of Integrative Plant Biology* 55:619-630.
- Zhang F, Gonzalez A, Zhao M, Payne CT, Lloyd A. 2003. A network of redundant bHLH proteins functions in all TTG1-dependent pathways of *Arabidopsis*. *Development*.
- Zhao H, Wang X, Zhu D, Cui S, Li X, Cao Y, Ma L. 2012. A Single Amino Acid Substitution in IIIf Subfamily of Basic Helix-Loop-Helix Transcription Factor *AtMYC1* Leads to Trichome and Root Hair Patterning Defects by Abolishing Its Interaction with Partner Proteins in *Arabidopsis*. *Journal of Biological Chemistry* 287:14109-14121.
- Zhao M, Morohashi K, Hatlestad G, Grotewold E, Lloyd A. 2008. The TTG1-bHLH-MYB complex controls trichome cell fate and patterning through direct targeting of regulatory loci. *Development* 135:1991-1999.
- Zimmermann IM, Heim MA, Weisshaar B, Uhrig JF. 2004. Comprehensive identification of *Arabidopsis thaliana* MYB transcription factors interacting with R/B-like BHLH proteins. *The Plant Journal* 40:22-34.
